# Supplementary material for: Comparative Genomic and Transcriptomic Analysis of Phenol Degradation and Tolerance in Acinetobacter lwoffii through Adaptive Evolution
Source: MDPI journal article supplement (doi:10.3390/ijms242216529), 2023-11-20
Supplement: s1 [file s1]

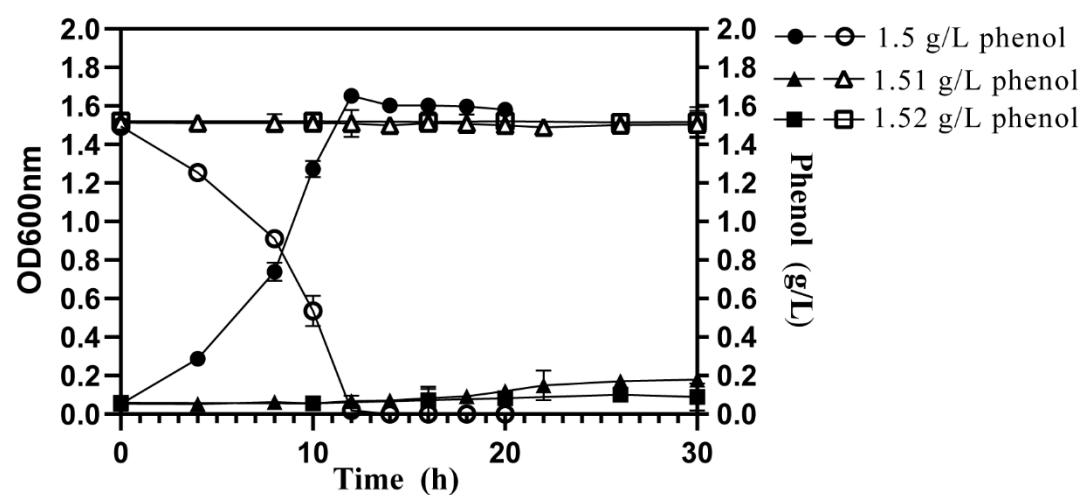

Figure S6. *Acinetobacter lwoffii* NL1 and NL115 grown on minimal mineral medium using more than 1.5 g/L phenol as sole carbon source.
