# Supplementary material for: Comparative Genomic and Transcriptomic Analysis of Phenol Degradation and Tolerance in Acinetobacter lwoffii through Adaptive Evolution
Source: MDPI journal article supplement (doi:10.3390/ijms242216529), 2023-11-20
Supplement: s1 [file s1]

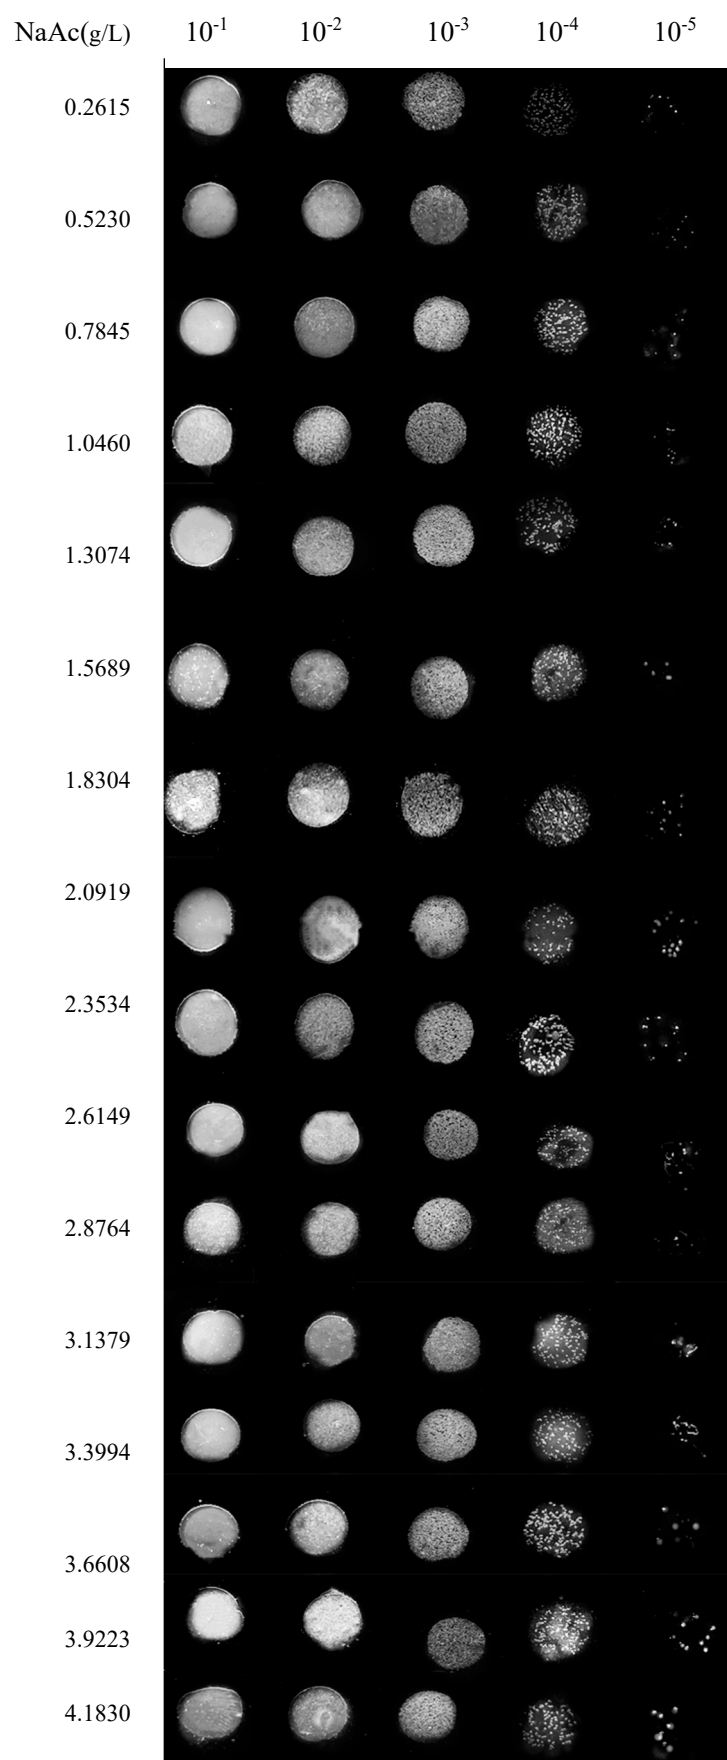

**Figure S1. Pot assays of *Acinetobacter lwoffii* NL115 growth on sodium acetate**

**plates with different concentrations.**
