# Supplementary material for: Comparative Genomic and Transcriptomic Analysis of Phenol Degradation and Tolerance in Acinetobacter lwoffii through Adaptive Evolution
Source: MDPI journal article supplement (doi:10.3390/ijms242216529), 2023-11-20
Supplement: s1 [file s1]

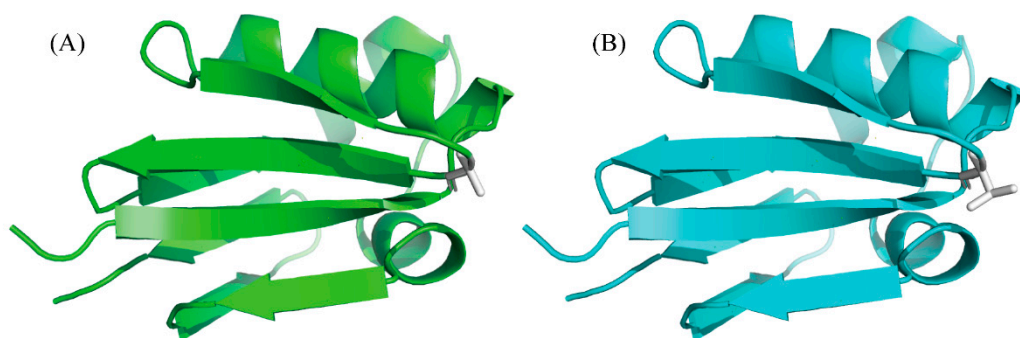

**Figure S7. Predicted 3D structures of phenol hydroxylase protein component P2.**

(A) in LSNL\_2977 of *Acinetobacter lwoffii* NL1 and (B) in LSNL\_2977 of *A. lwoffii* NL115.  
The stick molecules in white denote alanine (A) and valine (B) at position 35.
