# Supplementary material for: Comparative Genomic and Transcriptomic Analysis of Phenol Degradation and Tolerance in Acinetobacter lwoffii through Adaptive Evolution
Source: MDPI journal article supplement (doi:10.3390/ijms242216529), 2023-11-20
Supplement: s1 [file s1]

**Table S3. Primers used for qRT-PCR analysis**

| <b>Primer</b>            | <b>Sequences (5' to 3')</b> | <b>amplicon size</b> | <b>PCR efficiency (E)</b> |
|--------------------------|-----------------------------|----------------------|---------------------------|
| qRT-16S rRNA-F           | CTCGCAGAATAAGCACCG          | 177                  | 101%                      |
| qRT-16S rRNA-R           | CTCCCATACTCTAGCCAACC        |                      |                           |
| qRT- <i>LNSL</i> _1842-F | CCAGGACGAAGTAGAAGAAC        | 150                  | 103%                      |
| qRT- <i>LNSL</i> _1842-R | CAATCACCAGGACATCAAAG        |                      |                           |
| qRT- <i>LNSL</i> _1568-F | GATGCCGGTCAAGCCAATG         | 169                  | 104%                      |
| qRT- <i>LNSL</i> _1568-R | AGCCGACAGACTCAGGAGC         |                      |                           |
| qRT- <i>LNSL</i> _1974-F | TCGCTAAAGTCACTTCCAC         | 148                  | 108%                      |
| qRT- <i>LNSL</i> _1974-R | AAGACCCAAGGTCCTAAAT         |                      |                           |
| qRT- <i>LNSL</i> _1583-F | TGAAGAGCGTTTAACCAA          | 129                  | 104%                      |
| qRT- <i>LNSL</i> _1583-R | GCACTTTCTAAAGCCACC          |                      |                           |
| qRT- <i>LNSL</i> _1927-F | TCGGCGACCATGTTTTATTCAT      | 123                  | 107%                      |
| qRT- <i>LNSL</i> _1927-R | ACTCAAACCAATCAGCGCC         |                      |                           |
| qRT- <i>LNSL</i> _0414-F | AATGGTAGCTCGACCTGTGC        | 139                  | 105%                      |
| qRT- <i>LNSL</i> _0414-R | GGTTTTTCGCCAGGAAGCTG        |                      |                           |
| qRT- <i>LNSL</i> _3000-F | GCTGCATCACGCTGGTTTAC        | 122                  | 104%                      |
| qRT- <i>LNSL</i> _3000-R | GCCAAAGCTTCACAGCAACT        |                      |                           |
| qRT- <i>LNSL</i> _2975-F | TTGATGCCGCATTTGTTCGAG       | 103                  | 103%                      |
| qRT- <i>LNSL</i> _2975-R | TTGGTGGCACAAAACTCACG        |                      |                           |
| qRT- <i>LNSL</i> _2976-F | AACACGGGCGAATCTTTA          | 198                  | 108%                      |
| qRT- <i>LNSL</i> _2976-R | CTGATGCTGTGCCAACCA          |                      |                           |
| qRT- <i>LNSL</i> _1900-F | CCCGAGCAACTCAAACAG          | 150                  | 103%                      |
| qRT- <i>LNSL</i> _1900-R | TGCCTCGAATCCTCCTAA          |                      |                           |
| qRT- <i>LNSL</i> _3005-F | TTCGCAGCCCTCAAGTAA          | 102                  | 104%                      |
| qRT- <i>LNSL</i> _3005-R | CTCATGGGTCCACAAAGT          |                      |                           |
| qRT- <i>LNSL</i> _1838-F | CCGACTGAACTTGGTGAC          | 121                  | 103%                      |
| qRT- <i>LNSL</i> _1838-R | CTTCTGAAGAATCGTGCC          |                      |                           |
| qRT- <i>LNSL</i> _0302-F | GTTCTACCTAATCTGGCG          | 123                  | 105%                      |

---

|                          |                    |     |      |
|--------------------------|--------------------|-----|------|
| qRT- <i>LNSL</i> _0302-R | ACGTAGTGACTTGCGAAT |     |      |
| qRT- <i>LNSL</i> _2980-F | TTTCAGGCAGGGCAGTA  | 299 | 101% |
| qRT- <i>LNSL</i> _2980-R | CCCGATTCAAGCAGGTC  |     |      |
| qRT- <i>LNSL</i> _2981-F | TAACCGCCCATCTCACG  | 121 | 105% |
| qRT- <i>LNSL</i> _2981-R | TTCACGGGTAGCAAAGG  |     |      |

---
