# Supplementary material for: Comparative Genomic and Transcriptomic Analysis of Phenol Degradation and Tolerance in Acinetobacter lwoffii through Adaptive Evolution
Source: MDPI journal article supplement (doi:10.3390/ijms242216529), 2023-11-20
Supplement: s1 [file s1]

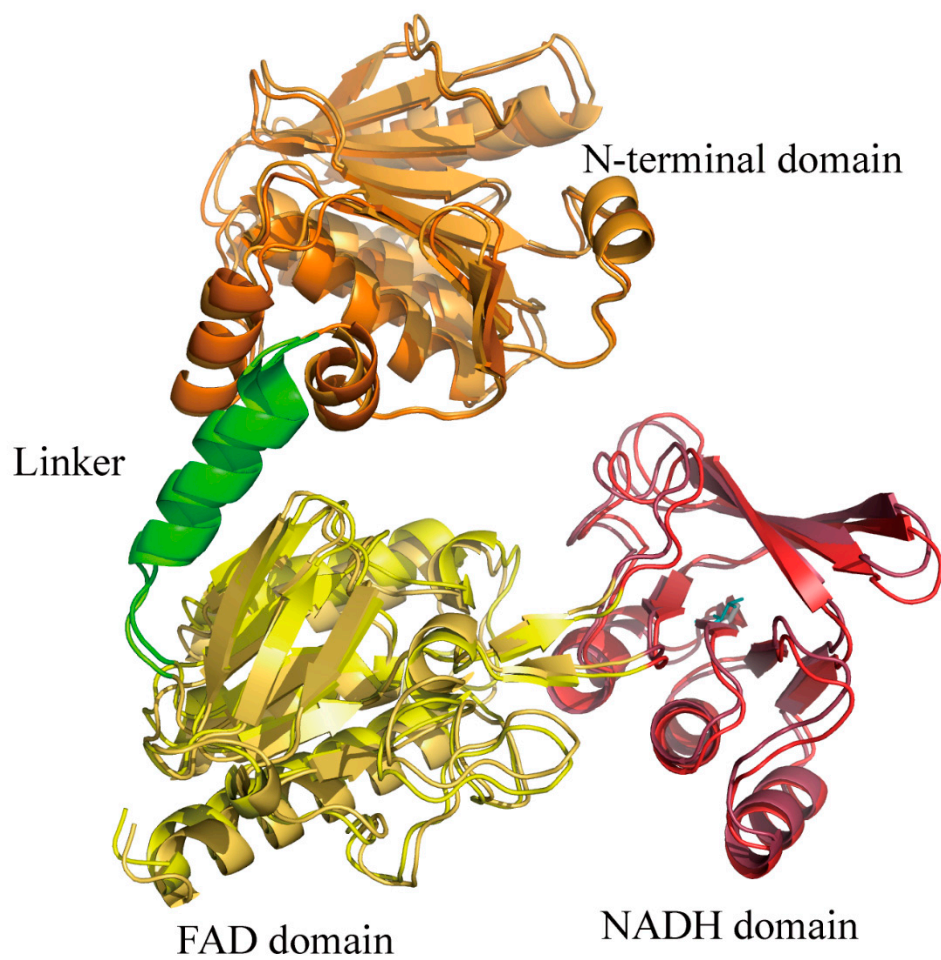

**Figure S9. Predicted 3D structure of AhpF.**

The stick molecules denote alanine (white) and threonine (cyan) at position 371 of the NADH domain.
