# Supplementary material for: Comparative Genomic and Transcriptomic Analysis of Phenol Degradation and Tolerance in Acinetobacter lwoffii through Adaptive Evolution
Source: MDPI journal article supplement (doi:10.3390/ijms242216529), 2023-11-20
Supplement: s1 [file s1]

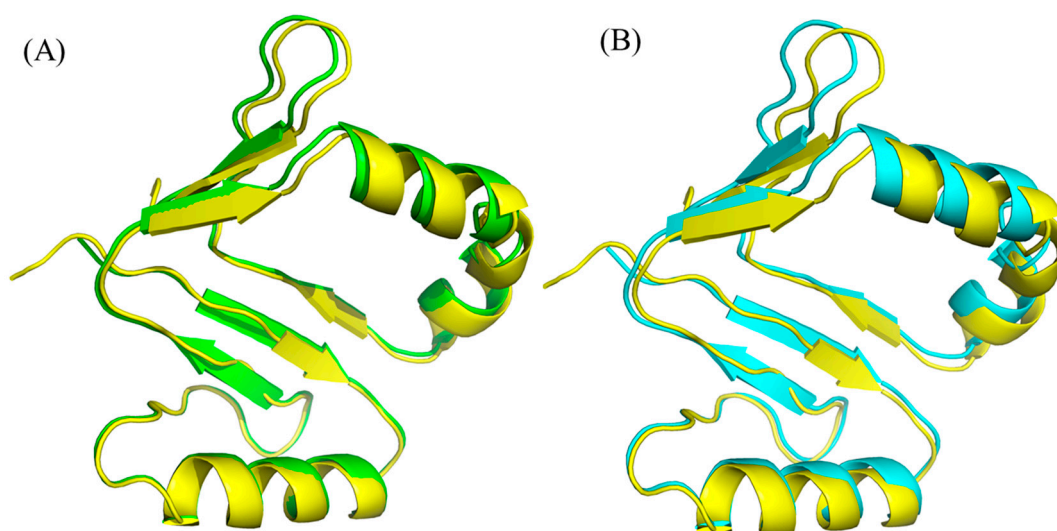

**Figure S8. Predicted 3D structures of phenol hydroxylase protein component P2 aligned to the characterized PDB structure (1HQI)**

(A) LSNL\_2977 of *Acinetobacter lwoffii* NL1 and (B) LSNL\_2977 of *A. lwoffii* NL115.  
The PDB structure 1HQI is highlighted in yellow.
