# Supplementary material for: Comparative Genomic and Transcriptomic Analysis of Phenol Degradation and Tolerance in Acinetobacter lwoffii through Adaptive Evolution
Source: MDPI journal article supplement (doi:10.3390/ijms242216529), 2023-11-20
Supplement: s1 [file s1]

**Table S2. Genes used for qRT-PCR**

| <b>Gene</b>      | <b>Product</b>                          | <b>Location</b>  |
|------------------|-----------------------------------------|------------------|
| <i>LNSL_0414</i> | Acetate kinase                          | chromosome       |
| <i>LNSL_1568</i> | Catechol 1,2-dioxygenase                | chromosome       |
| <i>LNSL_1583</i> | HTH-type transcriptional regulator QacR | chromosome       |
| <i>LNSL_1838</i> | Alkyl hydroperoxide reductase subunit C | chromosome       |
| <i>LNSL_1842</i> | alkyl hydroperoxide reductase subunit F | chromosome       |
| <i>LNSL_1900</i> | Superoxide dismutase                    | chromosome       |
| <i>LNSL_1927</i> | Hypothetical protein                    | chromosome       |
| <i>LNSL_1974</i> | Alkyl hydroperoxide reductase subunit F | chromosome       |
| <i>LNSL_2975</i> | Phenol hydroxylase P0 protein           | megaplasmid pNL1 |
| <i>LNSL_2976</i> | Phenol hydroxylase P1 protein           | megaplasmid pNL1 |
| <i>LNSL_2980</i> | Phenol hydroxylase P5 protein           | megaplasmid pNL1 |
| <i>LNSL_2981</i> | Catechol 1,2-dioxygenase                | megaplasmid pNL1 |
| <i>LNSL_3000</i> | 3-oxoadipate enol-lactonase             | megaplasmid pNL1 |
| <i>LNSL_0302</i> | Hypothetical protein                    | megaplasmid pNL1 |
| <i>LNSL_3005</i> | Muconate cycloisomerase                 | megaplasmid pNL1 |
