# Supplementary material for: Comparative Genomic and Transcriptomic Analysis of Phenol Degradation and Tolerance in Acinetobacter lwoffii through Adaptive Evolution
Source: Int J Mol Sci. 2023 Nov 20;24(22):16529. doi: 10.3390/ijms242216529 (PMC10671910; doi:10.3390/ijms242216529)
Supplement: Supplementary file 1 [file ijms-24-16529-s001.zip › Table S1.xlsx]

## Sheet: FevsNor.DEG
Table S1. Summary of sense mutations of genes in A. lwoffii NL115.
ref_gene_ID	ref_location	ref	AFLNL115AA	ref_base<->sample_base	cdsPos:phase	proPos	ref_codon<->sample_codon	ref_aa<->sample_aa	mutate_type	ref_gene_ID	ref_gene_start	ref_gene_end	ref_gene_strand	ref_gene_product
LNSL_1974	chromosome	G	A	G<->A	46.2917	371	GCG<->ACG	A<->T	nonsyn	LNSL_1974	1957122	1958687	+	--
LNSL_2510	chromosome	G	A	G<->A	11.584	93	GCA<->GTA	A<->V	nonsyn	LNSL_2510	2659139	2659450	-	--
LNSL_2977	pNL1	C	T	C<->T	4.33403	35	GCC<->GTC	A<->V	nonsyn	LNSL_2977	49922	50188	+	--
LNSL_3430	pNL3	T	C	T<->C	15.084	121	AAA<->AGA	K<->R	nonsyn	LNSL_3430	128212	128667	-	--
LNSL_3430	pNL3	C	T	C<->T	10.7917	87	GGC<->AGC	G<->S	nonsyn	LNSL_3430	128212	128667	-	--
LNSL_3430	pNL3	G	A	G<->A	4.20903	34	CCG<->CTG	P<->L	nonsyn	LNSL_3430	128212	128667	-	--
LNSL_3430	pNL3	A	C	A<->C	0.626389	5	TTT<->TTG	F<->L	nonsyn	LNSL_3430	128212	128667	-	--
LNSL_3430	pNL3	A	T	A<->T	0.334028	3	ATT<->AAT	I<->N	nonsyn	LNSL_3430	128212	128667	-	--
LNSL_3430	pNL3	G	C	G<->C	0.166667	2	CAA<->GAA	Q<->E	nonsyn	LNSL_3430	128212	128667	-	--
LNSL_3433	pNL3	G	A	G<->A	45.4167	364	GCA<->ACA	A<->T	nonsyn	LNSL_3433	129870	131555	+	--
LNSL_3433	pNL3	A	C	A<->C	46.6264	373	GAA<->GAC	E<->D	nonsyn	LNSL_3433	129870	131555	+	--
LNSL_3433	pNL3	G	A	G<->A	47.1667	378	GCT<->ACT	A<->T	nonsyn	LNSL_3433	129870	131555	+	--
LNSL_3433	pNL3	C	T	C<->T	47.334	379	GCC<->GTC	A<->V	nonsyn	LNSL_3433	129870	131555	+	--
LNSL_3433	pNL3	A	C	A<->C	48.5417	389	AAG<->CAG	K<->Q	nonsyn	LNSL_3433	129870	131555	+	--
LNSL_3433	pNL3	C	A	C<->A	49.334	395	ACG<->AAG	T<->K	nonsyn	LNSL_3433	129870	131555	+	--
LNSL_3433	pNL3	C	A	C<->A	49.5417	397	CAC<->AAC	H<->N	nonsyn	LNSL_3433	129870	131555	+	--
LNSL_3433	pNL3	G	C	G<->C	61.9167	496	GGA<->CGA	G<->R	nonsyn	LNSL_3433	129870	131555	+	--
LNSL_3433	pNL3	G	A	G<->A	61.959	496	GGA<->GAA	G<->E	nonsyn	LNSL_3433	129870	131555	+	--
LNSL_3433	pNL3	T	C	T<->C	64.459	516	GTG<->GCG	V<->A	nonsyn	LNSL_3433	129870	131555	+	--
LNSL_3433	pNL3	G	A	G<->A	68.709	550	AGC<->AAC	S<->N	nonsyn	LNSL_3433	129870	131555	+	--
LNSL_3434	pNL3	G	A	G<->A	0.209028	2	AGC<->AAC	S<->N	nonsyn	LNSL_3434	131573	131938	+	--
LNSL_3434	pNL3	A	G	A<->G	5.54167	45	ACC<->GCC	T<->A	nonsyn	LNSL_3434	131573	131938	+	--
LNSL_3434	pNL3	C	T	C<->T	6.29167	51	CGC<->TGC	R<->C	nonsyn	LNSL_3434	131573	131938	+	--
LNSL_3434	pNL3	G	A	G<->A	9.95903	80	GGT<->GAT	G<->D	nonsyn	LNSL_3434	131573	131938	+	--
LNSL_3434	pNL3	T	G	T<->G	10.1667	82	TCT<->GCT	S<->A	nonsyn	LNSL_3434	131573	131938	+	--
LNSL_3434	pNL3	G	C	G<->C	10.7917	87	GTG<->CTG	V<->L	nonsyn	LNSL_3434	131573	131938	+	--
LNSL_3434	pNL3	C	T	C<->T	11.2917	91	CTC<->TTC	L<->F	nonsyn	LNSL_3434	131573	131938	+	--
LNSL_3434	pNL3	A	G	A<->G	12.5417	101	AGC<->GGC	S<->G	nonsyn	LNSL_3434	131573	131938	+	--
LNSL_3434	pNL3	G	A	G<->A	12.584	101	AGC<->AAC	S<->N	nonsyn	LNSL_3434	131573	131938	+	--
LNSL_3434	pNL3	A	G	A<->G	12.9167	104	ATG<->GTG	M<->V	nonsyn	LNSL_3434	131573	131938	+	--
LNSL_3434	pNL3	G	A	G<->A	13.4167	108	GCC<->ACC	A<->T	nonsyn	LNSL_3434	131573	131938	+	--
LNSL_3434	pNL3	A	C	A<->C	13.5417	109	ATG<->CTG	M<->L	nonsyn	LNSL_3434	131573	131938	+	--
LNSL_3435	pNL3	G	A	G<->A	0.334028	3	AGC<->AAC	S<->N	nonsyn	LNSL_3435	131935	132171	+	--
LNSL_3435	pNL3	A	G	A<->G	0.709028	6	CAC<->CGC	H<->R	nonsyn	LNSL_3435	131935	132171	+	--
LNSL_3435	pNL3	C	G	C<->G	2.70903	22	GCG<->GGG	A<->G	nonsyn	LNSL_3435	131935	132171	+	--
LNSL_3435	pNL3	A	G	A<->G	4.54167	37	ATT<->GTT	I<->V	nonsyn	LNSL_3435	131935	132171	+	--
LNSL_3435	pNL3	A	C	A<->C	5.91667	48	ATC<->CTC	I<->L	nonsyn	LNSL_3435	131935	132171	+	--
LNSL_3435	pNL3	G	T	G<->T	6.58403	53	GGT<->GTT	G<->V	nonsyn	LNSL_3435	131935	132171	+	--
LNSL_3435	pNL3	A	G	A<->G	7.16667	58	ACG<->GCG	T<->A	nonsyn	LNSL_3435	131935	132171	+	--
LNSL_3435	pNL3	C	G	C<->G	7.20903	58	ACG<->AGG	T<->R	nonsyn	LNSL_3435	131935	132171	+	--
LNSL_3435	pNL3	G	C	G<->C	7.91667	64	GTC<->CTC	V<->L	nonsyn	LNSL_3435	131935	132171	+	--
LNSL_3435	pNL3	G	C	G<->C	8.29167	67	GTG<->CTG	V<->L	nonsyn	LNSL_3435	131935	132171	+	--
LNSL_3435	pNL3	A	T	A<->T	8.41667	68	ACG<->TCG	T<->S	nonsyn	LNSL_3435	131935	132171	+	--
LNSL_3435	pNL3	C	G	C<->G	8.66667	70	CTG<->GTG	L<->V	nonsyn	LNSL_3435	131935	132171	+	--
LNSL_3435	pNL3	T	C	T<->C	8.70903	70	CTG<->CCG	L<->P	nonsyn	LNSL_3435	131935	132171	+	--
LNSL_3435	pNL3	A	G	A<->G	9.33403	75	AAG<->AGG	K<->R	nonsyn	LNSL_3435	131935	132171	+	--
LNSL_3435	pNL3	G	A	G<->A	9.45903	76	GGA<->GAA	G<->E	nonsyn	LNSL_3435	131935	132171	+	--
LNSL_3435	pNL3	T	G	T<->G	9.66667	78	TCA<->GCA	S<->A	nonsyn	LNSL_3435	131935	132171	+	--
LNSL_3435	pNL3	C	A	C<->A	9.70903	78	TCA<->TAA	S<->X	nonsense	LNSL_3435	131935	132171	+	--
