# Supplementary material for: Comparative Genomic and Transcriptomic Analysis of Phenol Degradation and Tolerance in Acinetobacter lwoffii through Adaptive Evolution
Source: Int J Mol Sci. 2023 Nov 20;24(22):16529. doi: 10.3390/ijms242216529 (PMC10671910; doi:10.3390/ijms242216529)
Supplement: Supplementary file 1 [file ijms-24-16529-s001.zip › Table S4.xlsx]

## Sheet: DEG under phenol
Table S4. Summary of the differentially expressed genes shared by A. lwoffii NL1 and NL115 in the presence of phenol.
Gene_id	log2FoldChange (NL1)	log2FoldChange (NL115)	Location	Start	End	Strand	description
LNSL_0302	1.1939	1.53524	chromosome	337642	337821	+	Hypothetical protein
LNSL_0868	1.27795	1.00712	chromosome	947268	947471	+	Hypothetical protein
LNSL_0981	1.25083	2.35431	chromosome	1060417	1060896	+	Hypothetical protein
LNSL_0997	1.54354	3.45507	chromosome	1071530	1072714	+	Uncharacterized protein HI_1405
LNSL_0999	1.10021	2.92251	chromosome	1073206	1074201	+	Hypothetical protein
LNSL_1000	1.19919	2.82763	chromosome	1074215	1074601	+	Hypothetical protein
LNSL_1001	1.18127	3.99939	chromosome	1074610	1074993	+	Hypothetical protein
LNSL_1002	2.72115	3.96964	chromosome	1075003	1075197	+	Hypothetical protein
LNSL_1005	1.36445	2.97863	chromosome	1076179	1076940	+	Hypothetical protein
LNSL_1049	1.4382	5.40661	chromosome	1119884	1120747	-	Hypothetical protein
LNSL_1312	1.85263	2.07805	chromosome	1393558	1394667	-	Nitrogen regulation protein NtrB
LNSL_1405	1.28983	1.98628	chromosome	1486965	1487231	+	Hypothetical protein
LNSL_1518	1.51702	1.87635	chromosome	1613890	1614807	-	HTH-type transcriptional regulator MetR
LNSL_1531	3.30611	3.13957	chromosome	1626157	1626423	-	Hypothetical protein
LNSL_1532	1.42113	2.70004	chromosome	1626426	1627451	-	Cyclic pyranopterin monophosphate synthase
LNSL_1537	1.98655	2.83472	chromosome	1635950	1636528	+	Probable transcriptional regulatory protein pdtaR
LNSL_1538	1.38194	2.65082	chromosome	1636539	1637555	+	Bicarbonate transport ATP-binding protein CmpC
LNSL_1539	2.0513	3.44538	chromosome	1637802	1638746	+	Probable ABC transporter permease protein BruAb2_1124
LNSL_1540	1.65761	3.89184	chromosome	1638746	1639639	+	Uncharacterized ABC transporter ATP-binding protein MJ0412
LNSL_1542	1.0658	3.31681	chromosome	1640049	1641125	+	Probable iron/ascorbate oxidoreductase DDB_G0283291
LNSL_1543	1.01648	2.4026	chromosome	1641129	1642142	+	Uncharacterized zinc-type alcohol dehydrogenase-like protein YjgB
LNSL_1547	1.46054	3.33984	chromosome	1645204	1647012	-	Allophanate hydrolase
LNSL_1553	1.47567	3.70918	chromosome	1655808	1656458	-	Uncharacterized protein YcgI
LNSL_1554	1.7976	4.08938	chromosome	1656470	1657321	-	Uncharacterized protein YcgI
LNSL_1566	1.62771	3.79304	chromosome	1670237	1671346	+	Muconate cycloisomerase 1
LNSL_1567	1.93733	4.45596	chromosome	1671360	1671650	+	Muconolactone Delta-isomerase
LNSL_1568	1.90068	5.52957	chromosome	1671813	1672733	+	Catechol 1,2-dioxygenase
LNSL_1569	2.21804	5.32082	chromosome	1672809	1674197	+	Benzoate 1,2-dioxygenase subunit alpha
LNSL_1570	1.67699	5.9328	chromosome	1674194	1674685	+	Benzoate 1,2-dioxygenase subunit beta
LNSL_1571	1.63291	4.68594	chromosome	1674776	1675792	+	Benzoate 1,2-dioxygenase electron transfer component
LNSL_1572	1.0477	4.17938	chromosome	1675810	1676595	+	1,6-dihydroxycyclohexa-2,4-diene-1-carboxylate dehydrogenase
LNSL_1623	1.0688	1.42908	chromosome	1732840	1734054	-	Alkane 1-monooxygenase
LNSL_1723	2.16172	1.01147	chromosome	1835446	1835676	-	Probable acyl-CoA dehydrogenase YngJ
LNSL_2054	2.51918	3.23379	chromosome	2183156	2184505	+	IAA-amino acid hydrolase ILR1-like 3
LNSL_2458	7.66185	6.7902	chromosome	2619585	2619983	+	Probable transposase for insertion sequence element IS702
LNSL_2597	2.91379	2.92384	chromosome	2743354	2743548	+	Bacterioferritin-associated ferredoxin
LNSL_2699	1.99035	3.07981	chromosome	2857211	2857945	-	Hypothetical protein
LNSL_2975	2.86534	4.73038	pNL1	48593	48886	+	Phenol hydroxylase P0 protein
LNSL_2976	2.41088	4.71812	pNL1	48906	49910	+	Phenol hydroxylase P1 protein
LNSL_2977	2.1989	4.58106	pNL1	49922	50188	+	Phenol hydroxylase P2 protein
LNSL_2978	1.17136	6.01746	pNL1	50237	51763	+	Phenol hydroxylase P3 protein
LNSL_2979	2.93825	7.06687	pNL1	51881	52243	+	Phenol hydroxylase P4 protein
LNSL_2980	2.41047	6.67106	pNL1	52312	53373	+	Phenol hydroxylase P5 protein
LNSL_2981	2.67741	6.69013	pNL1	53521	54441	+	Catechol 1,2-dioxygenase
LNSL_2982	2.4151	6.06647	pNL1	54600	55472	+	Hypothetical protein
LNSL_2989	3.31679	2.14953	pNL1	57894	58973	+	Toluene-4-sulfonate monooxygenase system iron-sulfur subunit TsaM1
LNSL_3000	1.86888	3.66018	pNL1	67229	68008	-	3-oxoadipate enol-lactonase 2
LNSL_3001	3.07262	3.87286	pNL1	68126	69331	-	Beta-ketoadipyl-CoA thiolase
LNSL_3002	4.00444	3.86555	pNL1	69461	70114	-	3-oxoadipate CoA-transferase subunit B
LNSL_3003	3.15067	3.35283	pNL1	70135	70806	-	3-oxoadipate CoA-transferase subunit A
LNSL_3004	2.53528	4.18573	pNL1	71008	71298	-	Muconolactone Delta-isomerase
LNSL_3005	3.23998	2.70916	pNL1	71313	72422	-	Muconate cycloisomerase 1
LNSL_3007	2.53233	4.09525	pNL1	73499	75112	-	Uncharacterized protein ACIAD1444
LNSL_3008	2.05566	2.26347	pNL1	75109	76368	-	Uncharacterized protein ACIAD1443
LNSL_3009	2.52679	3.38227	pNL1	76457	77401	-	Catechol 1,2-dioxygenase
LNSL_3111	3.91073	6.02525	pNL1	166378	166896	-	Probable transposase for transposon Tn903
LNSL_3112	8.08356	9.49724	pNL1	167316	167609	-	Phenol hydroxylase P0 protein
LNSL_3356	3.3994	1.54287	pNL3	63637	64131	-	FMN reductase (NADH) RutF
LNSL_3357	4.20943	1.57525	pNL3	64230	65273	-	Probable methylcobalamin:homocysteine methyltransferase
LNSL_3358	5.6663	2.4621	pNL3	65324	66307	-	Hypothetical protein
LNSL_3360	3.17004	2.00337	pNL3	67703	68371	+	Uncharacterized protein HI_0882
LNSL_0008	-2.15332	-1.71218	chromosome	11438	12442	+	Hypothetical protein
LNSL_0009	-1.78599	-2.06665	chromosome	12697	13707	+	Hypothetical protein
LNSL_0010	-2.6408	-2.73939	chromosome	13901	14908	+	Hypothetical protein
LNSL_0018	-1.13306	-1.19591	chromosome	22190	23260	+	Lipase 2
LNSL_0025	-1.28354	-1.16826	chromosome	34204	34743	-	Lipoprotein signal peptidase
LNSL_0030	-2.01782	-2.22374	chromosome	40454	41260	-	Aliphatic sulfonates import ATP-binding protein SsuB
LNSL_0031	-3.47227	-2.48981	chromosome	41282	42097	-	Putative aliphatic sulfonates transport permease protein SsuC
LNSL_0032	-2.62226	-3.85433	chromosome	42097	43272	-	Alkanesulfonate monooxygenase
LNSL_0033	-1.97073	-5.73374	chromosome	43309	44304	-	Putative aliphatic sulfonates-binding protein
LNSL_0034	-1.52678	-1.56381	chromosome	44329	45285	-	Putative aliphatic sulfonates-binding protein
LNSL_0035	-1.06534	-1.03809	chromosome	45619	46962	-	Amino-acid acetyltransferase
LNSL_0041	-1.45757	-1.4283	chromosome	50128	50817	-	Phosphoglycolate phosphatase 2
LNSL_0052	-1.27178	-1.5324	chromosome	58727	60862	-	Uncharacterized signaling protein CC_0091
LNSL_0059	-1.29792	-2.33089	chromosome	67967	68920	+	Uncharacterized sodium-dependent transporter YocS
LNSL_0060	-2.12183	-2.39569	chromosome	69098	71161	+	Polyphosphate kinase
LNSL_0064	-1.05706	-1.23745	chromosome	75939	77453	+	Hypothetical protein
LNSL_0067	-1.56014	-4.24189	chromosome	77639	78169	+	Putative ankyrin repeat protein PA3287
LNSL_0068	-1.00241	-1.38581	chromosome	78289	79494	+	Nicotinate phosphoribosyltransferase
LNSL_0070	-1.33153	-1.40679	chromosome	80525	81376	+	Phosphatidylserine decarboxylase proenzyme
LNSL_0078	-1.20064	-2.56381	chromosome	89207	89734	+	Disulfide bond formation protein B
LNSL_0080	-1.15141	-1.913	chromosome	91365	91958	+	Esterase YqiA
LNSL_0083	-1.50382	-1.36388	chromosome	95574	97208	+	High-affinity branched-chain amino acid transport system permease protein LivH
LNSL_0084	-3.31163	-1.12641	chromosome	97213	98286	+	High-affinity branched-chain amino acid transport system permease protein LivM
LNSL_0085	-1.29057	-2.28141	chromosome	98283	99101	+	High-affinity branched-chain amino acid transport ATP-binding protein BraF
LNSL_0094	-1.1265	-1.73506	chromosome	105881	107722	+	Thiol:disulfide interchange protein DsbD
LNSL_0095	-1.04226	-1.54674	chromosome	107751	108947	-	Uncharacterized protein YhcK
LNSL_0102	-2.5662	-3.41181	chromosome	114296	114505	-	Cold shock protein CspV
LNSL_0105	-2.1566	-1.06131	chromosome	116490	117974	-	Copper resistance protein A
LNSL_0122	-2.43198	-1.86638	chromosome	136655	137230	+	Transmembrane protein 165
LNSL_0124	-1.59658	-2.17425	chromosome	138404	138673	+	Putative ferredoxin
LNSL_0136	-1.02427	-1.64082	chromosome	151425	152405	-	Uncharacterized MscS family protein AF_1546
LNSL_0140	-1.65752	-1.63339	chromosome	156678	158087	-	Deoxyribodipyrimidine photo-lyase
LNSL_0141	-2.39106	-3.84675	chromosome	158235	159347	-	Alkanesulfonate monooxygenase
LNSL_0142	-1.91628	-2.82685	chromosome	159374	160108	-	FMN reductase (NADPH)
LNSL_0145	-1.08412	-1.79637	chromosome	162397	165888	-	Autoinducer 2 sensor kinase/phosphatase LuxQ
LNSL_0147	-1.19651	-2.36117	chromosome	166405	168111	+	Cation/acetate symporter ActP
LNSL_0149	-2.2855	-2.42167	chromosome	169246	171216	+	High-affinity choline transport protein
LNSL_0162	-1.00901	-4.02269	chromosome	187692	188540	+	Erythromycin 3''-O-methyltransferase
LNSL_0165	-1.57387	-2.53957	chromosome	190926	192092	+	Hypothetical protein
LNSL_0169	-2.27735	-1.24189	chromosome	194629	196611	+	Hypothetical protein
LNSL_0170	-1.31997	-1.1024	chromosome	196619	199249	+	Hypothetical protein
LNSL_0177	-2.54564	-1.86638	chromosome	204626	205993	-	Replicative DNA helicase
LNSL_0181	-2.64358	-2.74439	chromosome	207497	207811	-	Hypothetical protein
LNSL_0182	-5.3402	-3.29673	chromosome	207808	208503	-	Hypothetical protein
LNSL_0192	-1.23477	-1.38086	chromosome	217384	218040	+	Hypothetical protein
LNSL_0195	-1.04646	-1.78245	chromosome	220174	220800	+	Uncharacterized protein YsdA
LNSL_0200	-1.50958	-1.0556	chromosome	224081	224599	-	Inner membrane protein YhaI
LNSL_0201	-1.01796	-1.06658	chromosome	224731	225348	-	Imidazole glycerol phosphate synthase subunit HisH
LNSL_0206	-1.04314	-1.21917	chromosome	228712	228984	+	Hypothetical protein
LNSL_0214	-1.43198	-1.32435	chromosome	236819	237607	-	ATP-dependent protease ATP-binding subunit-like protein AmiB
LNSL_0219	-1.37905	-1.56673	chromosome	240923	241522	+	CDP-diacylglycerol--glycerol-3-phosphate 3-phosphatidyltransferase
LNSL_0229	-1.16962	-2.85069	chromosome	249711	250139	+	Long-chain acyl-CoA thioesterase FadM
LNSL_0230	-1.09786	-1.2969	chromosome	250284	250607	+	Trans-acting regulatory protein HvrA
LNSL_0242	-1.12393	-2.7328	chromosome	262376	262882	+	50S ribosomal protein L10
LNSL_0249	-1.00541	-2.20209	chromosome	274254	275618	+	Uncharacterized membrane protein HI_0325
LNSL_0250	-1.01192	-1.9622	chromosome	275950	276555	+	Outer membrane protein W
LNSL_0251	-1.16854	-1.72022	chromosome	276730	277074	+	Hypothetical protein
LNSL_0257	-1.74071	-5.65974	chromosome	282750	282917	-	Hypothetical protein
LNSL_0262	-1.04735	-1.13182	chromosome	287966	288730	-	Transcriptional regulatory protein OmpR
LNSL_0266	-1.19829	-1.56663	chromosome	293092	294711	-	Probable ubiquinone biosynthesis protein UbiB
LNSL_0267	-1.195	-1.47551	chromosome	294724	295401	-	Hypothetical protein
LNSL_0279	-1.4673	-2.3346	chromosome	314076	314537	-	Hypothetical protein
LNSL_0281	-1.01721	-1.45065	chromosome	315785	317638	-	Glutathione-regulated potassium-efflux system protein KefB
LNSL_0285	-1.1604	-2.58398	chromosome	322091	322426	+	Hypothetical protein
LNSL_0289	-1.0081	-1.26282	chromosome	325540	327252	-	Probable electron transfer flavoprotein-ubiquinone oxidoreductase
LNSL_0295	-3.73006	-3.24189	chromosome	331894	332079	-	Hypothetical protein
LNSL_0298	-1.12617	-2.54813	chromosome	333401	334600	+	Uncharacterized protein YtfP
LNSL_0307	-1.05586	-2.24189	chromosome	341518	343587	-	Glycine--tRNA ligase beta subunit
LNSL_0309	-1.78528	-1.79828	chromosome	344883	345680	+	Uncharacterized protein ML0607
LNSL_0313	-1.00971	-1.76673	chromosome	349181	349966	-	Hypothetical protein
LNSL_0316	-1.3321	-1.85075	chromosome	352107	353948	-	Long-chain fatty acid transport protein 4
LNSL_0317	-1.01137	-1.53575	chromosome	354122	357601	-	Ribonuclease E
LNSL_0323	-1.15525	-2.34142	chromosome	363932	365191	+	Porin-like protein NicP
LNSL_0329	-1.57617	-1.00869	chromosome	370121	370936	+	3-phenylpropionate-dihydrodiol/cinnamic acid-dihydrodiol dehydrogenase
LNSL_0330	-1.09619	-1.72915	chromosome	371165	372130	+	2,3-dihydroxyphenylpropionate/2,3-dihydroxicinnamic acid 1,2-dioxygenase
LNSL_0348	-1.10369	-2.14025	chromosome	390307	390957	+	3-isopropylmalate dehydratase small subunit
LNSL_0375	-1.61532	-3.88323	chromosome	419733	419888	-	50S ribosomal protein L33
LNSL_0376	-1.14898	-3.20071	chromosome	419901	420137	-	50S ribosomal protein L28
LNSL_0377	-1.35314	-2.66334	chromosome	420303	421751	-	Probable coniferyl aldehyde dehydrogenase
LNSL_0385	-1.10639	-1.90389	chromosome	426788	427837	-	Hypothetical protein
LNSL_0390	-1.47087	-2.00742	chromosome	431023	431409	-	Hypothetical protein
LNSL_0392	-1.78199	-1.79899	chromosome	431887	432696	-	Prolipoprotein diacylglyceryl transferase
LNSL_0395	-2.46472	-2.41181	chromosome	436072	436848	-	Sec-independent protein translocase protein TatC
LNSL_0398	-1.21866	-3.78621	chromosome	437680	438561	+	Hypothetical protein
LNSL_0413	-1.89763	-3.61681	chromosome	457098	459236	-	Phosphate acetyltransferase
LNSL_0414	-1.2256	-3.74097	chromosome	459292	460512	-	Acetate kinase
LNSL_0445	-1.45905	-2.16797	chromosome	496732	497115	-	Insertion element IS630 uncharacterized 39 kDa protein
LNSL_0449	-1.48107	-1.20626	chromosome	500745	501266	+	Hypothetical protein
LNSL_0456	-2.29299	-1.85012	chromosome	504624	506714	+	Outer membrane usher protein CS3-2
LNSL_0457	-1.29266	-1.2908	chromosome	506725	507135	+	Hypothetical protein
LNSL_0495	-1.58137	-2.08623	chromosome	544292	545056	-	Hypothetical protein
LNSL_0496	-3.15293	-1.0529	chromosome	545198	547312	+	Probable TonB-dependent receptor NMB0964
LNSL_0507	-1.61345	-1.75646	chromosome	558422	558928	+	Uncharacterized N-acetyltransferase YhbS
LNSL_0512	-1.16774	-1.40058	chromosome	563495	564079	-	Cob(I)yrinic acid a,c-diamide adenosyltransferase
LNSL_0517	-1.45186	-1.94233	chromosome	570266	571270	+	L-gulono-1,4-lactone dehydrogenase
LNSL_0531	-1.40709	-1.87388	chromosome	581393	581752	+	50S ribosomal protein L20
LNSL_0536	-1.3391	-1.0884	chromosome	587482	587778	+	Integration host factor subunit alpha
LNSL_0537	-1.96724	-1.64017	chromosome	587884	588171	-	Hypothetical protein
LNSL_0544	-1.05039	-3.07316	chromosome	595301	595870	+	Uncharacterized protein PA0392
LNSL_0549	-1.05018	-1.70251	chromosome	603746	605233	+	Type II secretion system protein E
LNSL_0568	-1.6442	-1.85332	chromosome	628259	629092	+	Uncharacterized protein MTH_1463
LNSL_0571	-2.07759	-1.56381	chromosome	632017	633273	+	Actin cytoskeleton-regulatory complex protein PAN1
LNSL_0572	-1.16824	-1.64628	chromosome	633295	635226	+	Hypothetical protein
LNSL_0580	-1.0041	-1.06652	chromosome	641123	641959	+	S-formylglutathione hydrolase
LNSL_0581	-1.29479	-1.58381	chromosome	642078	643175	+	Inner membrane protein YjgN
LNSL_0582	-1.86065	-1.52877	chromosome	643187	644326	+	CAAX prenyl protease 1 homolog
LNSL_0611	-1.01782	-3.3106	chromosome	671240	671935	+	Uncharacterized HTH-type transcriptional regulator in the TAR-I ttuE-ttuC' intergenic region
LNSL_0625	-1.7967	-1.35534	chromosome	692194	693132	+	Glutathione transport system permease protein GsiC
LNSL_0642	-1.44878	-1.50166	chromosome	705850	706317	-	Leucine-responsive regulatory protein
LNSL_0643	-1.17575	-3.11959	chromosome	706458	707717	+	D-amino acid dehydrogenase small subunit
LNSL_0644	-2.36112	-2.56512	chromosome	707752	708864	+	Alanine racemase
LNSL_0645	-1.83871	-4.14643	chromosome	708913	709278	+	RutC family protein HD_0322
LNSL_0646	-1.89719	-1.55846	chromosome	709448	710875	+	D-serine/D-alanine/glycine transporter
LNSL_0647	-1.60522	-1.71383	chromosome	710935	711387	-	UPF0093 membrane protein jhp_1377
LNSL_0677	-1.19054	-1.74278	chromosome	742469	742801	+	Protein RnfH
LNSL_0678	-1.00412	-1.46068	chromosome	742902	743300	-	Outer membrane protein assembly factor BamE
LNSL_0683	-1.05172	-1.43303	chromosome	746954	748063	-	Hypothetical protein
LNSL_0686	-1.17465	-1.98991	chromosome	753395	753853	+	Hypothetical protein
LNSL_0753	-1.1566	-1.21274	chromosome	817268	818491	+	Lipoprotein-releasing system transmembrane protein LolC
LNSL_0767	-1.05233	-2.38873	chromosome	831824	833017	+	Bacteroid development protein BacA
LNSL_0770	-1.67117	-2.30602	chromosome	836165	836893	+	Hypothetical protein
LNSL_0778	-1.57073	-3.06874	chromosome	843903	844394	+	Rod shape-determining protein MreD
LNSL_0785	-1.11304	-3.51433	chromosome	850433	851653	-	Hypothetical protein
LNSL_0786	-1.15334	-1.6629	chromosome	851966	853294	-	Hypothetical protein
LNSL_0787	-1.09063	-3.69745	chromosome	853796	855151	-	Aromatic amino acid transport protein AroP
LNSL_0792	-1.30786	-1.33737	chromosome	860464	860937	-	Uncharacterized protein MJ0826
LNSL_0793	-1.45677	-2.77586	chromosome	861040	861957	-	Uncharacterized NTE family protein YlbK
LNSL_0796	-1.97929	-1.89589	chromosome	862730	864025	+	Putative transporter AmpG 4
LNSL_0799	-1.40448	-1.16526	chromosome	866162	866839	-	UPF0702 transmembrane protein YcaP
LNSL_0813	-1.05698	-2.41657	chromosome	885056	886708	+	Low-affinity inorganic phosphate transporter 1
LNSL_0838	-1.47311	-1.50678	chromosome	914537	915688	+	Putative transposase y4zB
LNSL_0842	-1.46548	-1.74853	chromosome	918539	918979	-	Universal stress protein MJ0531
LNSL_0849	-1.42877	-1.19183	chromosome	925815	927713	+	Succinate dehydrogenase flavoprotein subunit
LNSL_0860	-2.50124	-4.22374	chromosome	939925	940575	-	Inner membrane protein YqiK
LNSL_0861	-1.16421	-3.01177	chromosome	940613	941248	-	Inner membrane protein YqiJ
LNSL_0884	-1.46954	-2.01949	chromosome	962844	963578	-	Hypothetical protein
LNSL_0908	-1.57528	-1.40623	chromosome	989067	989354	-	Hypothetical protein
LNSL_0913	-1.13867	-2.08988	chromosome	992989	993870	+	Hypothetical protein
LNSL_0932	-1.01048	-1.17262	chromosome	1013470	1014480	+	Inner membrane ABC transporter permease protein YejE
LNSL_0944	-1.42063	-2.03038	chromosome	1027954	1029225	+	Phytochrome-like protein cph2
LNSL_0954	-1.6408	-2.37705	chromosome	1039741	1040544	+	Uncharacterized protein YoaT
LNSL_0955	-1.85655	-1.60299	chromosome	1040688	1041158	+	Hypothetical protein
LNSL_0956	-1.18763	-1.94549	chromosome	1041236	1043122	+	Hypothetical protein
LNSL_0962	-1.06205	-2.24189	chromosome	1047687	1048493	-	Indole-3-glycerol phosphate synthase
LNSL_0996	-1.56899	-2.30602	chromosome	1071214	1071303	+	Hypothetical protein
LNSL_1038	-1.07413	-1.14459	chromosome	1107567	1108928	+	Putative pyrimidine permease RutG
LNSL_1055	-1.0311	-1.54914	chromosome	1126661	1127248	+	Outer membrane lipoprotein blc
LNSL_1056	-1.18878	-4.09987	chromosome	1127411	1128349	+	Uncharacterized transporter PM1281
LNSL_1065	-1.23532	-2.98389	chromosome	1138359	1139048	+	Hypothetical protein
LNSL_1066	-2.41727	-3.31989	chromosome	1139045	1139359	+	Hypothetical protein
LNSL_1070	-1.12685	-1.28769	chromosome	1140890	1142257	+	Replicative DNA helicase
LNSL_1076	-2.30946	-1.26337	chromosome	1145844	1147448	+	Hypothetical protein
LNSL_1077	-1.49401	-1.16266	chromosome	1147445	1149973	+	Hypothetical protein
LNSL_1080	-1.15492	-1.90085	chromosome	1150875	1151306	+	Hypothetical protein
LNSL_1086	-1.10317	-2.70903	chromosome	1158198	1158755	+	Uncharacterized protein y4hP
LNSL_1088	-1.18307	-2.34142	chromosome	1159930	1160526	-	Putative undecaprenyl-diphosphatase YbjG
LNSL_1092	-2.33633	-2.33448	chromosome	1165216	1166247	+	Protein SphX
LNSL_1093	-1.60727	-2.74215	chromosome	1166352	1167731	+	Probable ABC transporter permease protein YqgH
LNSL_1098	-1.3344	-2.89049	chromosome	1172550	1172981	+	Hypothetical protein
LNSL_1100	-1.2065	-2.04298	chromosome	1173344	1173991	-	Inner membrane protein YjdF
LNSL_1126	-1.6119	-3.62265	chromosome	1200518	1202617	+	Carbon starvation protein A
LNSL_1127	-2.13103	-3.38132	chromosome	1202628	1202930	+	Uncharacterized protein YbdD
LNSL_1129	-1.17367	-1.90485	chromosome	1204345	1205250	+	Hypothetical protein
LNSL_1130	-1.17194	-1.21086	chromosome	1205264	1207258	+	Uncharacterized protein YebA
LNSL_1145	-1.23507	-1.3488	chromosome	1219492	1220871	-	Sensor protein QseC
LNSL_1216	-1.18574	-1.24189	chromosome	1289323	1289595	+	Hypothetical protein
LNSL_1287	-1.11299	-1.27633	chromosome	1363778	1365757	-	Hypothetical protein
LNSL_1305	-1.24464	-2.93256	chromosome	1385125	1386012	-	Probable sodium/metabolite cotransporter BASS1, chloroplastic
LNSL_1345	-1.08621	-1.92525	chromosome	1424716	1425570	+	Uncharacterized protein HI_1376
LNSL_1358	-1.66263	-1.84516	chromosome	1435725	1439480	-	Bifunctional protein PutA
LNSL_1359	-1.17027	-1.15434	chromosome	1439599	1440093	+	Leucine-responsive regulatory protein
LNSL_1400	-1.51594	-2.17014	chromosome	1482471	1483610	+	2-methylcitrate synthase
LNSL_1424	-1.63875	-1.34142	chromosome	1504389	1504871	+	Hypothetical protein
LNSL_1426	-1.43984	-1.48981	chromosome	1505313	1505597	-	Hypothetical protein
LNSL_1437	-1.28552	-1.91996	chromosome	1515136	1515903	+	Outer membrane protein A
LNSL_1439	-1.75863	-3.70132	chromosome	1517562	1517948	-	Acyl-CoA synthetase family member 2, mitochondrial
LNSL_1441	-1.89356	-4.41181	chromosome	1518906	1519292	+	Diacylglycerol kinase
LNSL_1442	-2.05583	-2.69332	chromosome	1519332	1520042	+	Hypothetical protein
LNSL_1445	-2.13932	-2.86638	chromosome	1522068	1523753	-	Phosphoethanolamine transferase EptA
LNSL_1446	-1.48956	-2.77794	chromosome	1523859	1524770	-	Hypothetical protein
LNSL_1447	-1.63555	-1.27431	chromosome	1525120	1526493	-	5-methylthioadenosine/S-adenosylhomocysteine deaminase
LNSL_1449	-1.65325	-1.95238	chromosome	1527491	1528588	-	Glucose ABC transporter permease protein TsgB13
LNSL_1459	-1.85673	-1.8608	chromosome	1539145	1540503	-	Putative purine permease YgfU
LNSL_1485	-1.46777	-1.06855	chromosome	1568342	1569565	+	CaiB/baiF CoA-transferase family protein C7orf10 homolog
LNSL_1487	-1.17771	-1.17832	chromosome	1570915	1572597	-	Long-chain-fatty-acid--CoA ligase
LNSL_1495	-1.79146	-1.38873	chromosome	1580765	1581202	+	Putative esterase F42H10.6
LNSL_1497	-1.33252	-1.06424	chromosome	1582559	1584079	-	3-hydroxyadipyl-CoA dehydrogenase
LNSL_1498	-2.16021	-2.00742	chromosome	1584082	1584855	-	Probable enoyl-CoA hydratase, mitochondrial
LNSL_1500	-1.48354	-1.11064	chromosome	1586726	1587991	+	Hypothetical protein
LNSL_1509	-1.68269	-1.59549	chromosome	1599059	1600771	+	Probable electron transfer flavoprotein-ubiquinone oxidoreductase
LNSL_1511	-1.75664	-2.51274	chromosome	1603573	1604343	-	Hypothetical protein
LNSL_1535	-1.09467	-1.06131	chromosome	1631265	1632875	-	Nitrite reductase [NAD(P)H]
LNSL_1578	-1.9191	-1.41181	chromosome	1681514	1682401	-	Hypothetical protein
LNSL_1583	-1.05583	-2.43453	chromosome	1688189	1688794	+	HTH-type transcriptional regulator QacR
LNSL_1595	-1.06689	-1.31919	chromosome	1702762	1703790	+	Ornithine utilization regulator
LNSL_1597	-1.05354	-3.24189	chromosome	1704487	1705662	+	Uncharacterized MFS-type transporter YwoG
LNSL_1615	-1.16867	-2.24189	chromosome	1724726	1725337	+	Uncharacterized endonuclease HI_1296
LNSL_1620	-1.13743	-1.87194	chromosome	1728694	1729896	+	Uncharacterized MFS-type transporter YwoG
LNSL_1632	-1.192	-1.68512	chromosome	1742561	1743469	-	Hypothetical protein
LNSL_1633	-1.02111	-3.16789	chromosome	1743595	1744116	-	Protein RibT
LNSL_1639	-1.64668	-4.09175	chromosome	1749172	1750467	+	Acyl-CoA dehydrogenase
LNSL_1640	-1.51071	-4.54306	chromosome	1750491	1751327	+	Probable medium-chain specific acyl-CoA dehydrogenase, mitochondrial
LNSL_1642	-1.08621	-3.4707	chromosome	1751804	1752295	+	Uncharacterized N-acetyltransferase YjgM
LNSL_1673	-3.9931	-2.16789	chromosome	1783997	1784098	+	Uncharacterized protein YbgT
LNSL_1689	-1.07951	-1.04025	chromosome	1799154	1800053	+	Probable HTH-type transcriptional regulator LtrA
LNSL_1693	-1.50124	-1.24189	chromosome	1803655	1804113	-	Hypothetical protein
LNSL_1705	-2.50124	-2.82685	chromosome	1814587	1814874	-	Hypothetical protein
LNSL_1711	-1.05888	-2.10529	chromosome	1823927	1825246	+	Lysophospholipid transporter LplT
LNSL_1732	-1.25257	-1.45524	chromosome	1843651	1844214	+	Hypothetical protein
LNSL_1738	-1.78295	-2.02367	chromosome	1852436	1853056	+	Cytochrome o ubiquinol oxidase subunit 3
LNSL_1739	-2.51116	-2.0383	chromosome	1853056	1853382	+	Cytochrome o ubiquinol oxidase protein CyoD
LNSL_1767	-6.52915	-3.56381	chromosome	1881517	1882086	-	Hypothetical protein
LNSL_1773	-1.02951	-3.16541	chromosome	1887214	1888389	+	Inner membrane protein YdcO
LNSL_1774	-1.54564	-1.82685	chromosome	1888429	1888773	-	Multidrug transporter EmrE
LNSL_1780	-1.04197	-1.8344	chromosome	1894570	1894827	+	Hypothetical protein
LNSL_1823	-1.38987	-1.6834	chromosome	1936620	1937147	-	Protein hfq
LNSL_1845	-1.38104	-2.14521	chromosome	1959546	1960184	-	Threonine efflux protein
LNSL_1846	-1.3381	-4.55658	chromosome	1960316	1961062	+	Putative transposase for insertion sequence element IS6501
LNSL_1890	-1.32	-1.20536	chromosome	2018994	2020241	-	Integrase
LNSL_1896	-3.91628	-1.07766	chromosome	2024312	2025415	+	Hypothetical protein
LNSL_1905	-1.40814	-1.24189	chromosome	2031846	2032490	+	Hypothetical protein
LNSL_1912	-1.85174	-2.48289	chromosome	2040571	2041782	+	Uncharacterized protein YjiJ
LNSL_1917	-1.09838	-1.1317	chromosome	2045251	2045646	+	5-hydroxyisourate hydrolase
LNSL_1918	-1.96528	-1.24269	chromosome	2045780	2046163	-	Insertion element IS630 uncharacterized 39 kDa protein
LNSL_1920	-3.1451	-1.93725	chromosome	2046844	2047443	-	Hypothetical protein
LNSL_1927	-1.12015	-2.53286	chromosome	2054486	2054794	-	Hypothetical protein
LNSL_1938	-1.41357	-2.61534	chromosome	2065950	2066537	-	Ribonuclease HII
LNSL_1940	-1.17932	-4.04924	chromosome	2067093	2067749	+	Cytochrome b561 homolog 2
LNSL_1943	-1.22769	-4.05399	chromosome	2069271	2070593	-	Putative permease MJ0326
LNSL_1945	-1.12953	-1.45761	chromosome	2072679	2073311	+	Uncharacterized protein RP471
LNSL_1952	-1.65755	-1.0705	chromosome	2079944	2081086	-	Long-chain specific acyl-CoA dehydrogenase, mitochondrial
LNSL_1969	-2.21866	-2.76061	chromosome	2097468	2097719	-	Hypothetical protein
LNSL_1973	-1.38577	-1.595	chromosome	2100556	2100810	+	Uncharacterized ferredoxin-like protein HI_0527
LNSL_1982	-1.89356	-2.94233	chromosome	2110803	2111450	+	Hypothetical protein
LNSL_1986	-1.25839	-1.39943	chromosome	2115463	2116380	-	Hypothetical protein
LNSL_1988	-1.18084	-1.53997	chromosome	2117644	2118417	+	Inner membrane transport permease YadH
LNSL_1999	-2.87348	-1.7724	chromosome	2128022	2129194	-	Multidrug resistance protein NorM
LNSL_2001	-1.6377	-1.85271	chromosome	2129934	2130389	-	Hypothetical protein
LNSL_2029	-1.06349	-2.02894	chromosome	2156168	2156836	+	7-cyano-7-deazaguanine synthase
LNSL_2039	-1.12219	-1.44539	chromosome	2164665	2164982	-	UPF0135 protein Rv2230c/MT2289
LNSL_2047	-1.37161	-1.60097	chromosome	2175340	2176977	+	Sodium/pantothenate symporter
LNSL_2060	-1.76988	-1.48721	chromosome	2189197	2189769	+	Peptidoglycan-associated lipoprotein
LNSL_2069	-1.07194	-1.18648	chromosome	2195273	2196082	-	Hypothetical protein
LNSL_2070	-7.98659	-4.95192	chromosome	2196187	2197056	+	Probable transposase for transposon Tn903
LNSL_2071	-1.84109	-3.44352	chromosome	2197086	2197895	-	Hypothetical protein
LNSL_2076	-1.05596	-1.64106	chromosome	2201863	2202666	-	Sigma factor SigB regulation protein RsbQ
LNSL_2080	-1.38415	-1.74795	chromosome	2207323	2208006	-	Lipoprotein-releasing system ATP-binding protein LolD
LNSL_2081	-1.03698	-1.86296	chromosome	2207999	2209234	-	Lipoprotein-releasing system transmembrane protein LolC
LNSL_2097	-2.33524	-2.4131	chromosome	2226175	2226780	-	Leucine efflux protein
LNSL_2111	-1.16528	-1.6956	chromosome	2239173	2240906	+	Hypothetical protein
LNSL_2112	-2.82317	-3.24189	chromosome	2240903	2241241	+	Hypothetical protein
LNSL_2129	-1.18627	-1.19769	chromosome	2261814	2263154	-	Magnesium transporter MgtE
LNSL_2185	-1.75694	-2.51393	chromosome	2318543	2319076	+	Hypothetical protein
LNSL_2186	-1.8068	-1.94897	chromosome	2319078	2320262	+	1,3-propanediol dehydrogenase
LNSL_2197	-1.05043	-1.95115	chromosome	2329925	2331940	+	Hypothetical protein
LNSL_2201	-1.32407	-1.84928	chromosome	2337189	2338655	+	Outer membrane protein OprM
LNSL_2220	-1.08621	-1.34622	chromosome	2353262	2354461	-	Uncharacterized MFS-type transporter YwoG
LNSL_2225	-1.44695	-2.1853	chromosome	2357676	2358881	+	Probable chromate transport protein
LNSL_2227	-1.07131	-2.85136	chromosome	2360457	2361695	-	Sodium/glutamate symport carrier protein
LNSL_2238	-1.22599	-1.09923	chromosome	2375305	2375454	+	Entericidin B
LNSL_2268	-1.31608	-1.42669	chromosome	2413405	2413554	-	Hypothetical protein
LNSL_2269	-1.00096	-1.76085	chromosome	2413684	2413851	-	Hypothetical protein
LNSL_2270	-1.86216	-1.75104	chromosome	2413920	2415866	-	Uncharacterized protein YgxB
LNSL_2282	-1.00521	-2.53414	chromosome	2422589	2424133	-	NADH-quinone oxidoreductase subunit N
LNSL_2285	-1.32184	-3.32043	chromosome	2427644	2427952	-	NADH-quinone oxidoreductase subunit K
LNSL_2286	-1.13867	-3.0332	chromosome	2427952	2428473	-	NADH-quinone oxidoreductase subunit J
LNSL_2287	-1.11922	-2.65865	chromosome	2428470	2429012	-	NADH-quinone oxidoreductase subunit I
LNSL_2288	-1.34154	-2.70258	chromosome	2429031	2430047	-	NADH-quinone oxidoreductase subunit H
LNSL_2296	-1.03868	-1.55159	chromosome	2438700	2440373	-	Sensor protein RstB
LNSL_2319	-1.08621	-1.88574	chromosome	2467376	2468041	-	Ribosomal large subunit pseudouridine synthase A
LNSL_2329	-1.06822	-1.76573	chromosome	2478703	2479629	-	Putative malonate transporter
LNSL_2331	-1.94534	-3.48981	chromosome	2480892	2482160	-	Porin B
LNSL_2340	-1.12034	-1.66565	chromosome	2491118	2492176	-	Outer membrane protein Omp38
LNSL_2362	-1.00934	-1.46428	chromosome	2514034	2514708	+	Uncharacterized protein YwbG
LNSL_2390	-1.23383	-1.9734	chromosome	2545692	2546684	-	Hypothetical protein
LNSL_2398	-1.64053	-1.67822	chromosome	2555556	2555885	+	UPF0092 membrane protein YajC
LNSL_2407	-1.19415	-1.39214	chromosome	2568408	2569196	+	Delta(3,5)-Delta(2,4)-dienoyl-CoA isomerase, mitochondrial
LNSL_2418	-1.06086	-2.71268	chromosome	2579532	2580806	-	Coenzyme A biosynthesis bifunctional protein CoaBC
LNSL_2419	-2.53551	-1.46428	chromosome	2580920	2581621	+	UPF0758 protein ACIAD3126
LNSL_2420	-1.06676	-1.89606	chromosome	2581687	2582598	+	UPF0187 protein mll4386
LNSL_2442	-2.4355	-2.46428	chromosome	2604620	2604877	-	Hypothetical protein
LNSL_2462	-1.14235	-1.19458	chromosome	2623330	2624217	-	Aromatic amino acid exporter YddG
LNSL_2476	-1.44103	-1.75785	chromosome	2637439	2639721	-	Hypothetical protein
LNSL_2477	-1.95657	-1.97124	chromosome	2639919	2640491	-	Hypothetical protein
LNSL_2483	-1.1913	-1.4474	chromosome	2645897	2646262	-	50S ribosomal protein L17
LNSL_2488	-1.54564	-1.45979	chromosome	2648812	2648928	-	50S ribosomal protein L36
LNSL_2491	-1.07651	-1.36662	chromosome	2650757	2650933	-	50S ribosomal protein L30
LNSL_2517	-1.31866	-1.39461	chromosome	2666005	2667264	-	Putative sodium-dependent excitatory amino acid transporter glt-4
LNSL_2518	-1.27192	-1.12736	chromosome	2667426	2668298	-	Acyl-CoA thioesterase 2
LNSL_2532	-1.30793	-2.83175	chromosome	2681631	2682410	-	Probable phospholipid ABC transporter permease protein MlaE
LNSL_2542	-1.14885	-1.85266	chromosome	2694159	2695982	+	Acyl-CoA dehydrogenase
LNSL_2547	-1.27176	-1.97495	chromosome	2699515	2700873	+	Probable multidrug resistance protein NorM
LNSL_2555	-1.39202	-1.03038	chromosome	2705674	2706252	-	Hypothetical protein
LNSL_2560	-1.00973	-1.37939	chromosome	2709570	2711753	+	Inner membrane protein YccS
LNSL_2568	-1.4974	-3.75646	chromosome	2718791	2719657	+	Inner membrane transporter RhtA
LNSL_2576	-1.01909	-1.82685	chromosome	2725806	2726159	-	UPF0721 transmembrane protein ORF9
LNSL_2582	-1.44878	-2.14878	chromosome	2731897	2732877	+	Lactonizing lipase
LNSL_2583	-1.23249	-1.59105	chromosome	2732949	2733323	-	50S ribosomal protein L19
LNSL_2591	-1.04557	-1.06355	chromosome	2737554	2738126	-	Fimbrial protein
LNSL_2626	-1.00082	-1.5149	chromosome	2777884	2778948	-	Sulfate-binding protein
LNSL_2636	-1.75153	-1.74226	chromosome	2790858	2793695	+	Probable K(+)/H(+) antiporter subunit A/B
LNSL_2637	-1.01495	-1.82685	chromosome	2793700	2794065	+	Probable K(+)/H(+) antiporter subunit C
LNSL_2638	-1.70335	-1.59983	chromosome	2794065	2795873	+	Probable K(+)/H(+) antiporter subunit D
LNSL_2639	-1.25191	-1.15677	chromosome	2795873	2796391	+	Na(+)/H(+) antiporter subunit E1
LNSL_2641	-1.54711	-1.39389	chromosome	2796674	2797075	+	Na(+)/H(+) antiporter subunit G
LNSL_2642	-1.07157	-1.93531	chromosome	2797163	2797567	-	Ribosome-binding factor A
LNSL_2646	-1.01111	-3.26703	chromosome	2803288	2803617	-	Protein-export membrane protein SecG
LNSL_2663	-1.51505	-1.40586	chromosome	2820879	2820995	+	Hypothetical protein
LNSL_2670	-1.33584	-2.36647	chromosome	2826410	2827606	-	Lipid II flippase FtsW
LNSL_2685	-1.1317	-1.0829	chromosome	2844073	2845143	-	Lipopolysaccharide export system permease protein LptG
LNSL_2688	-1.23478	-1.25522	chromosome	2847844	2848251	+	DNA polymerase III subunit chi
LNSL_2690	-2.43134	-1.59944	chromosome	2848969	2849514	-	Protein DedA
LNSL_2701	-1.00639	-1.41352	chromosome	2859985	2860521	-	Inorganic pyrophosphatase
LNSL_2702	-1.34679	-1.34077	chromosome	2860639	2861037	-	Hypothetical protein
LNSL_2711	-1.90423	-4.45296	chromosome	2871073	2872047	-	Hypothetical protein
LNSL_2712	-1.33775	-1.03657	chromosome	2872201	2873985	-	Gigasin-3a
LNSL_2713	-1.80786	-1.73092	chromosome	2874196	2875587	+	Putative multidrug resistance protein MdtD
LNSL_2715	-1.42063	-2.01949	chromosome	2876487	2877503	+	UPF0173 metal-dependent hydrolase Bpro_4324
LNSL_2717	-1.36711	-3.7724	chromosome	2878802	2880112	+	Shikimate transporter
LNSL_2721	-1.03227	-2.31513	chromosome	2884091	2885284	-	Inner membrane transport protein YnfM
LNSL_2726	-1.17641	-1.7724	chromosome	2896172	2897311	+	Protein smf
LNSL_2728	-1.02167	-2.53046	chromosome	2898356	2899252	-	Uncharacterized transporter YyaM
LNSL_2734	-1.57696	-2.79581	chromosome	2904548	2904967	-	ATP synthase epsilon chain
LNSL_2735	-1.08204	-3.49132	chromosome	2904995	2906389	-	ATP synthase subunit beta
LNSL_2736	-1.07933	-3.78291	chromosome	2906416	2907285	-	ATP synthase gamma chain
LNSL_2737	-1.35181	-3.47849	chromosome	2907375	2908919	-	ATP synthase subunit alpha
LNSL_2738	-1.28959	-3.78798	chromosome	2908965	2909501	-	ATP synthase subunit delta
LNSL_2739	-1.206	-3.68141	chromosome	2909514	2909984	-	ATP synthase subunit b
LNSL_2740	-1.27967	-3.50867	chromosome	2910024	2910269	-	ATP synthase subunit c
LNSL_2743	-2.03696	-1.00088	chromosome	2911908	2912744	-	High-affinity zinc uptake system protein ZnuA
LNSL_2746	-1.17502	-2.14096	chromosome	2914156	2914956	+	High-affinity zinc uptake system membrane protein ZnuB
LNSL_2747	-1.04377	-2.12324	chromosome	2915031	2915651	-	Homoserine/homoserine lactone efflux protein
LNSL_2751	-2.22086	-2.6204	chromosome	2918127	2919224	-	Acidic endochitinase P
LNSL_2753	-1.77426	-4.41181	chromosome	2919888	2920271	+	Uncharacterized protein y4pE/y4sA
LNSL_2755	-3.80406	-2.35736	chromosome	2920961	2923822	-	Hypothetical protein
LNSL_2757	-1.80991	-1.98297	chromosome	2925352	2926716	+	Probable multidrug resistance protein YoeA
LNSL_2769	-1.12097	-2.38873	chromosome	2939655	2940248	-	Hypothetical protein
LNSL_2774	-1.3547	-1.89396	chromosome	2943251	2943478	-	SPBc2 prophage-derived uncharacterized protein YopB
LNSL_2776	-1.97929	-1.19298	chromosome	2943820	2945004	+	Putative lambdoid prophage Qin defective integrase
LNSL_2779	-1.83828	-1.15942	chromosome	2945906	2946652	+	DNA replication protein DnaC
LNSL_2781	-1.50124	-2.44352	chromosome	2947542	2948081	+	Hypothetical protein
LNSL_2788	-1.38166	-3.70132	chromosome	2953256	2954152	+	Hypothetical protein
LNSL_2790	-1.78135	-3.14878	chromosome	2955472	2956542	+	Hypothetical protein
LNSL_2791	-2.03217	-1.76545	chromosome	2956539	2959496	+	Hypothetical protein
LNSL_2807	-1.50844	-3.13497	chromosome	2978456	2978977	+	Phosphatidylglycerophosphatase A
LNSL_2808	-1.27738	-3.08932	chromosome	2978998	2980362	+	Bifunctional protein GlmU
LNSL_2820	-1.31753	-1.22694	chromosome	2997083	2998102	-	UDP-glucose 4-epimerase
LNSL_2821	-1.22653	-1.22481	chromosome	2998095	2999762	-	Glucose-6-phosphate isomerase
LNSL_2822	-1.17476	-1.56811	chromosome	2999762	3001018	-	UDP-glucose 6-dehydrogenase
LNSL_2824	-1.18729	-1.49968	chromosome	3001931	3003805	-	Capsular polysaccharide biosynthesis protein CapD
LNSL_2835	-2.11863	-3.82685	chromosome	3014078	3015304	-	Hypothetical protein
LNSL_2836	-1.59267	-4.39839	chromosome	3015421	3016611	-	Hypothetical protein
LNSL_2847	-1.72008	-2.28141	chromosome	3029298	3030542	-	Protein WzxE
LNSL_2850	-1.48639	-1.95809	chromosome	3032310	3033188	-	Glucose-1-phosphate thymidylyltransferase 2
LNSL_2853	-1.07423	-1.60962	chromosome	3036312	3038495	+	Tyrosine-protein kinase ptk
LNSL_2859	-1.03297	-1.38206	chromosome	3042719	3043261	+	L-Ala--D-Glu endopeptidase
LNSL_2862	-1.06199	-1.07487	chromosome	3044133	3045161	+	Uncharacterized zinc-type alcohol dehydrogenase-like protein YjgB
LNSL_2864	-1.40814	-1.39389	chromosome	3046750	3047394	-	Uncharacterized protein PA1579
LNSL_2868	-1.89158	-3.4582	chromosome	3049230	3049445	-	Major cold shock protein
LNSL_2876	-1.22274	-1.76591	chromosome	3061216	3062511	+	Putative pyrimidine permease RutG
LNSL_2886	-2.40081	-1.35292	chromosome	3073328	3074137	-	Zinc transporter ZupT
LNSL_2889	-1.27063	-1.27103	chromosome	3076415	3077431	-	Lactaldehyde dehydrogenase
LNSL_2894	-1.71239	-2.18942	chromosome	3079997	3080671	-	Hypothetical protein
LNSL_2896	-1.02653	-1.76151	chromosome	3082460	3083824	-	Benzoate transport protein
LNSL_2898	-1.3086	-2.56381	chromosome	3090280	3090573	-	Hypothetical protein
LNSL_2909	-1.52123	-2.32512	chromosome	3102985	3103332	+	Hypothetical protein
LNSL_2912	-1.72436	-3.07478	chromosome	3104081	3105274	+	Probable sugar efflux transporter
LNSL_2920	-1.04233	-1.86161	chromosome	3110966	3112111	+	Tetracycline resistance protein
LNSL_2925	-1.01416	-3.806	chromosome	3116127	3116261	-	50S ribosomal protein L34
LNSL_2936	-1.28552	-3.30078	pNL1	10254	10937	+	Hypothetical protein
LNSL_2937	-1.28784	-2.19882	pNL1	10951	11898	+	Hypothetical protein
LNSL_2943	-1.60977	-1.74439	pNL1	16506	17708	+	Hypothetical protein
LNSL_2970	-1.0004	-1.03802	pNL1	40312	44151	+	Hypothetical protein
LNSL_2972	-2.25613	-3.04924	pNL1	44840	45085	+	Hypothetical protein
LNSL_2986	-1.40329	-1.03279	pNL1	56421	56717	-	Insertion element IS401 uncharacterized 12.4 kDa protein
LNSL_2988	-1.22264	-2.28124	pNL1	57097	57657	+	Probable transposase for transposon Tn903
LNSL_2997	-1.64387	-2.50103	pNL1	64357	66003	-	Uncharacterized protein y4qI
LNSL_2998	-1.60137	-1.7206	pNL1	66078	66413	-	Uncharacterized protein y4jC
LNSL_3044	-1.42408	-2.94233	pNL1	100521	100994	-	Hypothetical protein
LNSL_3064	-1.16421	-2.29251	pNL1	115413	115982	-	Hypothetical protein
LNSL_3098	-1.06196	-1.00485	pNL1	153657	154493	+	Hypothetical protein
LNSL_3102	-2.50767	-2.41181	pNL1	158752	159324	+	Hypothetical protein
LNSL_3105	-1.34255	-3.82685	pNL1	161217	161645	-	Hypothetical protein
LNSL_3108	-1.00677	-1.74439	pNL1	163207	163959	+	Hypothetical protein
LNSL_3109	-1.72667	-2.00742	pNL1	164328	165581	+	Hypothetical protein
LNSL_3130	-3.45288	-1.77734	pNL1	179101	179466	+	HTH-type transcriptional regulator MerD
LNSL_3134	-1.83327	-1.47651	pNL1	180726	181121	-	Transposon Tn501 resolvase
LNSL_3151	-1.07591	-1.02495	pNL1	199121	200620	+	Antiseptic resistance protein
LNSL_3168	-1.0415	-1.30151	pNL1	214543	215895	-	Benzoate transport protein
LNSL_3192	-2.70092	-3.24189	pNL1	242923	243675	-	Hypothetical protein
LNSL_3214	-1.19724	-1.10438	pNL1	258695	259564	-	Hypothetical protein
LNSL_3268	-1.30747	-2.81587	pNL2	12634	14238	+	Uncharacterized protein y4qI
LNSL_3277	-1.30747	-2.81587	pNL2	21960	23564	-	Uncharacterized protein y4qI
LNSL_3302	-2.20328	-1.70843	pNL3	5306	5479	-	Hypothetical protein
LNSL_3303	-2.08621	-1.87835	pNL3	5726	5956	+	Hypothetical protein
LNSL_3308	-1.08621	-2.92371	pNL3	8299	9504	+	Homoserine kinase
LNSL_3310	-1.15332	-1.31227	pNL3	11757	12326	+	Nicotinamide riboside transporter PnuC
LNSL_3311	-1.4042	-7.46383	pNL3	12504	14015	-	Aldehyde dehydrogenase
LNSL_3315	-1.27524	-2.21234	pNL3	17610	19169	-	Hypothetical protein
LNSL_3318	-1.36305	-1.37062	pNL3	20180	22336	-	FhuE receptor
LNSL_3319	-1.31758	-1.51436	pNL3	23156	24256	-	Inner membrane transport permease YbhR
LNSL_3320	-1.17024	-2.15318	pNL3	24253	25383	-	Inner membrane transport permease YbhR
LNSL_3323	-2.54564	-3.56381	pNL3	28466	29086	+	Hypothetical protein
LNSL_3325	-1.31448	-2.61534	pNL3	30151	31083	+	Biotin synthase
LNSL_3328	-1.33538	-2.6846	pNL3	33225	34394	+	Putative 8-amino-7-oxononanoate synthase
LNSL_3329	-1.1326	-2.32281	pNL3	34361	35146	+	Malonyl-CoA O-methyltransferase BioC
LNSL_3333	-3.73751	-5.54313	pNL3	37660	39324	+	L-lactate permease
LNSL_3334	-2.28784	-4.13085	pNL3	39342	40085	+	Putative L-lactate dehydrogenase operon regulatory protein
LNSL_3335	-1.70489	-3.58599	pNL3	40089	41234	+	L-lactate dehydrogenase [cytochrome]
LNSL_3341	-3.02858	-3.7064	pNL3	51362	52225	+	Hypothetical protein
LNSL_3345	-1.12743	-1.03279	pNL3	54245	54511	-	Hypothetical protein
LNSL_3350	-1.0305	-1.23188	pNL3	59815	60276	+	Hypothetical protein
LNSL_3351	-1.30747	-2.81587	pNL3	60655	62259	-	Uncharacterized protein y4qI
LNSL_3385	-1.45034	-1.8764	pNL3	91318	92313	+	Quinone oxidoreductase-like protein At1g23740, chloroplastic
LNSL_3386	-1.15976	-1.66815	pNL3	92303	93319	+	Uncharacterized zinc-type alcohol dehydrogenase-like protein YogA
LNSL_3388	-1.18421	-2.1715	pNL3	94369	95109	+	Uncharacterized oxidoreductase SSP1627
LNSL_3391	-1.13619	-1.90892	pNL3	97128	98030	-	Transposase for insertion sequence element IS629
LNSL_3396	-3.1026	-3.75501	pNL3	100337	101185	+	Zinc transporter ZitB
LNSL_3407	-1.17251	-2.55599	pNL3	111913	112563	-	Protein-S-isoprenylcysteine O-methyltransferase
LNSL_3418	-1.70288	-1.28371	pNL3	119048	119386	-	Hypothetical protein
LNSL_3427	-1.44878	-1.24189	pNL3	125725	126105	+	Protein YobA
LNSL_3428	-1.18574	-3.24189	pNL3	126170	127051	+	Hypothetical protein
LNSL_3442	-1.27383	-1.5149	pNL3	137035	137460	+	Hypothetical protein
LNSL_3443	-1.09681	-1.56158	pNL3	137582	139411	-	Ferrous iron transport protein B
LNSL_3449	-1.47087	-3.54306	pNL3	143409	144644	+	Cobalt-zinc-cadmium resistance protein CzcB
LNSL_3456	-1.19667	-1.1386	pNL3	150760	150954	+	Transposase for insertion sequence-like element IS431mec
LNSL_3460	-1.45905	-2.16797	pNL3	153690	154073	+	Insertion element IS630 uncharacterized 39 kDa protein
LNSL_3463	-1.38208	-1.60888	pNL3	156399	158018	+	Oleate hydratase
LNSL_3464	-1.49283	-2.17945	pNL3	158286	159344	+	(R,R)-butanediol dehydrogenase
LNSL_3468	-1.89356	-1.90482	pNL3	163450	163647	-	Hypothetical protein
LNSL_3470	-1.24927	-2.22054	pNL3	164265	165383	-	Adenosine monophosphate-protein transferase FICD
LNSL_3472	-2.12048	-1.97885	pNL3	166647	167075	+	Hypothetical protein
LNSL_3473	-2.39993	-3.1853	pNL3	167088	167555	+	Hypothetical protein
LNSL_3480	-2.31328	-2.59552	pNL3	170666	171448	-	UPF0721 transmembrane protein YjnA
LNSL_3489	-1.08621	-1.56381	pNL3	175558	176463	+	Uncharacterized HTH-type transcriptional regulator YafC

## Sheet: DEGs with KO 
LNSL_1673	K00424
LNSL_2755	K11904
LNSL_3333	K00427
LNSL_0031	K15554
LNSL_3130	K19057
LNSL_0084	K11961
LNSL_0496	K02014
LNSL_1999	K03327
LNSL_0032	K04091
LNSL_0102	K03704
LNSL_0177	K02314
LNSL_2419	K03630
LNSL_1739	K02300
LNSL_0395	K03118
LNSL_0122	K23541
LNSL_2690	K03975
LNSL_2886	K07238
LNSL_3473	K09936
LNSL_0141	K17228
LNSL_0644	K01775
LNSL_1092	K02040
LNSL_3480	K07090
LNSL_0456	K07347
LNSL_3334	K14348
LNSL_0149	K02168
LNSL_1498	K01692
LNSL_1445	K03760
LNSL_0060	K00937
LNSL_3472	K09936
LNSL_2743	K09815
LNSL_0030	K15555
LNSL_0796	K08218
LNSL_2776	K14059
LNSL_0033	K15553
LNSL_2331	K07267
LNSL_0142	K00299
LNSL_0413	K13788
LNSL_0646	K11737
LNSL_1441	K00901
LNSL_2868	K03704
LNSL_1459	K24206
LNSL_2779	K02315
LNSL_2713	K18326
LNSL_2186	K00001
LNSL_0625	K02033
LNSL_1738	K02299
LNSL_0392	K13292
LNSL_2060	K03640
LNSL_2636	K05559
LNSL_2912	K08159
LNSL_2847	K16693
LNSL_3335	K00101
LNSL_2638	K05561
LNSL_1509	K00311
LNSL_1358	K13821
LNSL_1952	K00249
LNSL_0140	K01669
LNSL_1449	K23535
LNSL_0568	K06992
LNSL_2997	K07484
LNSL_2398	K03210
LNSL_1447	K12960
LNSL_0375	K02913
LNSL_0507	K03824
LNSL_1126	K06200
LNSL_1093	K02037
LNSL_0647	K08973
LNSL_2998	K07484
LNSL_0124	K06940
LNSL_2734	K02114
LNSL_0329	K05711
LNSL_0778	K03571
LNSL_0067	K06867
LNSL_2641	K05564
LNSL_2488	K02919
LNSL_1774	K03297
LNSL_0034	K15553
LNSL_1400	K01659
LNSL_1640	K00249
LNSL_2807	K01095
LNSL_0083	K11960
LNSL_2568	K11939
LNSL_3464	K00004
LNSL_2850	K00973
LNSL_0838	K07495
LNSL_3449	K15727
LNSL_0884	K07090
LNSL_0041	K22292
LNSL_0793	K07001
LNSL_0517	K05888
LNSL_3385	K18980
LNSL_3427	K07156
LNSL_2582	K01046
LNSL_0642	K03719
LNSL_2225	K07240
LNSL_0849	K00239
LNSL_0944	K11444
LNSL_1938	K03470
LNSL_0531	K02887
LNSL_3311	K00138
LNSL_1823	K03666
LNSL_2080	K09810
LNSL_3463	K10254
LNSL_1845	K05835
LNSL_0219	K00995
LNSL_2047	K20989
LNSL_2717	K08172
LNSL_3318	K16088
LNSL_0377	K00154
LNSL_2737	K02111
LNSL_2288	K00337
LNSL_0536	K04764
LNSL_2670	K03588
LNSL_3328	K00652
LNSL_1497	K00074
LNSL_0316	K13776
LNSL_0070	K01613
LNSL_2201	K18139
LNSL_2285	K00340
LNSL_3319	K01992
LNSL_2820	K01784
LNSL_3325	K01012
LNSL_2532	K02066
LNSL_0792	K07340
LNSL_3268	K07484
LNSL_3277	K07484
LNSL_3351	K07484
LNSL_0059	K03453
LNSL_0085	K11962
LNSL_2738	K02113
LNSL_2937	K12213
LNSL_2936	K12214
LNSL_1437	K03286
LNSL_0025	K03101
LNSL_2740	K02110
LNSL_2808	K04042
LNSL_3442	K03325
LNSL_2518	K10805
LNSL_2547	K03327
LNSL_2639	K05562
LNSL_1305	K03453
LNSL_1145	K07645
LNSL_2688	K02339
LNSL_2583	K02884
LNSL_1943	K06901
LNSL_2821	K01810
LNSL_0414	K00925
LNSL_2876	K02824
LNSL_0398	K07088
LNSL_1100	K08984
LNSL_2739	K02109
LNSL_0078	K03611
LNSL_0266	K03688
LNSL_3456	K18320
LNSL_0147	K14393
LNSL_0267	K03690
LNSL_2407	K12663
LNSL_1632	K13936
LNSL_2483	K02879
LNSL_0677	K09801
LNSL_1056	K05786
LNSL_2824	K24300
LNSL_2129	K06213
LNSL_3428	K07245
LNSL_1088	K19302
LNSL_1988	K01992
LNSL_1940	K12262
LNSL_1487	K01897
LNSL_2726	K04096
LNSL_0643	K00285
LNSL_2746	K09816
LNSL_2822	K00012
LNSL_1130	K22452
LNSL_1359	K03719
LNSL_3320	K01992
LNSL_0229	K07107
LNSL_0512	K00798
LNSL_0753	K09808
LNSL_0323	K21758
LNSL_0786	K06076
LNSL_3310	K03811
LNSL_0080	K07000
LNSL_0376	K02902
LNSL_2286	K00339
LNSL_3391	K07497
LNSL_0018	K01066
LNSL_3329	K02169
LNSL_2685	K11720
LNSL_1945	K07018
LNSL_1070	K02314
LNSL_0094	K04084
LNSL_0242	K02864
LNSL_2340	K03286
LNSL_2287	K00338
LNSL_0785	K06076
LNSL_0348	K01704
LNSL_1917	K07127
LNSL_0230	K03746
LNSL_3443	K04759
LNSL_0330	K05713
LNSL_1535	K00362
LNSL_0787	K11734
LNSL_2319	K06177
LNSL_1642	K03828
LNSL_2735	K02112
LNSL_2736	K02115
LNSL_2491	K02907
LNSL_3151	K08167
LNSL_2853	K16692
LNSL_1038	K09016
LNSL_2642	K02834
LNSL_2227	K03312
LNSL_2329	K13936
LNSL_2420	K08994
LNSL_0035	K14682
LNSL_2029	K06920
LNSL_0962	K01609
LNSL_2862	K12957
LNSL_2418	K13038
LNSL_0066	K03781
LNSL_0813	K03306
LNSL_0307	K01879
LNSL_0767	K17938
LNSL_0544	K02221
LNSL_0549	K02454
LNSL_0262	K07659
LNSL_2591	K08084
LNSL_2747	K05834
LNSL_3168	K05548
LNSL_2296	K07639
LNSL_2081	K09808
LNSL_2859	K21472
LNSL_2721	K08224
LNSL_1055	K03098
LNSL_1773	K05782
LNSL_2896	K05548
LNSL_0136	K03442
LNSL_2576	K07090
LNSL_0201	K02501
LNSL_0281	K11747
LNSL_2637	K05560
LNSL_2925	K02914
LNSL_0250	K07275
LNSL_0317	K08300
LNSL_2646	K03075
LNSL_0932	K13895
LNSL_0313	K07090
LNSL_0289	K00311
LNSL_2701	K01507
LNSL_0249	K07084
LNSL_2282	K00343
LNSL_0678	K06186
LNSL_0580	K01070
LNSL_0068	K00763
LNSL_2626	K23163
