# Supplementary material for: Comparative Genomic and Transcriptomic Analysis of Phenol Degradation and Tolerance in Acinetobacter lwoffii through Adaptive Evolution
Source: Int J Mol Sci. 2023 Nov 20;24(22):16529. doi: 10.3390/ijms242216529 (PMC10671910; doi:10.3390/ijms242216529)
Supplement: Supplementary file 1 [file ijms-24-16529-s001.zip › Table S5.xlsx]

## Sheet: DEG under phenol
Table S5. Summary of the differentially expressed genes in A. lwoffii NL115 compared to A. lwoffii NL1 in phenol presence
Gene_id	log2FoldChange	Location	Start	End	Strand	description
LNSL_0029	1.01481	chromosome	39510	40184	-	HTH-type transcriptional regulator RutR
LNSL_0030	1.52671	chromosome	40454	41260	-	Aliphatic sulfonates import ATP-binding protein SsuB
LNSL_0031	2.38827	chromosome	41282	42097	-	Putative aliphatic sulfonates transport permease protein SsuC
LNSL_0032	2.94081	chromosome	42097	43272	-	Alkanesulfonate monooxygenase
LNSL_0033	2.22126	chromosome	43309	44304	-	Putative aliphatic sulfonates-binding protein
LNSL_0037	2.25185	chromosome	47724	48110	-	Hypothetical protein
LNSL_0038	3.2372	chromosome	48426	48581	-	Hypothetical protein
LNSL_0040	1.33853	chromosome	49342	50088	-	Uncharacterized oxidoreductase YciK
LNSL_0066	5.95027	chromosome	75939	77453	+	Catalase
LNSL_0067	4.49594	chromosome	77639	78169	+	Putative ankyrin repeat protein PA3287
LNSL_0071	1.10997	chromosome	81572	82189	-	Hypothetical protein
LNSL_0082	1.30125	chromosome	94199	95479	+	Aliphatic amidase expression-regulating protein
LNSL_0083	1.00447	chromosome	95574	97208	+	High-affinity branched-chain amino acid transport system permease protein LivH
LNSL_0084	1.80999	chromosome	97213	98286	+	High-affinity branched-chain amino acid transport system permease protein LivM
LNSL_0085	1.04584	chromosome	98283	99101	+	High-affinity branched-chain amino acid transport ATP-binding protein BraF
LNSL_0086	1.44365	chromosome	99112	99810	+	High-affinity branched-chain amino acid transport ATP-binding protein LivF
LNSL_0091	1.44003	chromosome	104049	104414	+	Hypothetical protein
LNSL_0102	2.57424	chromosome	114296	114505	-	Cold shock protein CspV
LNSL_0104	1.25185	chromosome	115556	116503	-	Copper resistance protein B
LNSL_0106	2.82216	chromosome	117999	118247	-	Copper resistance protein A
LNSL_0122	1.28783	chromosome	136655	137230	+	Transmembrane protein 165
LNSL_0141	1.90463	chromosome	158235	159347	-	Alkanesulfonate monooxygenase
LNSL_0147	1.42375	chromosome	166405	168111	+	Cation/acetate symporter ActP
LNSL_0149	1.59824	chromosome	169246	171216	+	High-affinity choline transport protein
LNSL_0151	1.00049	chromosome	173292	174998	+	Uncharacterized protein YhcK
LNSL_0158	1.87065	chromosome	182877	184241	+	Inner membrane transport protein YajR
LNSL_0160	6.30045	chromosome	185196	185759	+	Alkyl hydroperoxide reductase subunit C
LNSL_0161	1.01797	chromosome	186381	187688	+	Senecionine N-oxygenase
LNSL_0164	1.00613	chromosome	189912	190580	-	Hypothetical protein
LNSL_0173	1.01481	chromosome	202418	202639	+	Hypothetical protein
LNSL_0200	1.23173	chromosome	224081	224599	-	Inner membrane protein YhaI
LNSL_0203	1.01901	chromosome	226038	226415	+	Hypothetical protein
LNSL_0207	1.50867	chromosome	229201	230064	+	Probable S-adenosyl-L-methionine-dependent methyltransferase TehB
LNSL_0245	1.17498	chromosome	267844	272034	+	DNA-directed RNA polymerase subunit beta'
LNSL_0253	3.20829	chromosome	279352	279615	+	Hypothetical protein
LNSL_0257	1.44975	chromosome	282750	282917	-	Hypothetical protein
LNSL_0293	1.37695	chromosome	330180	331193	+	Ferrochelatase
LNSL_0295	2.18473	chromosome	331894	332079	-	Hypothetical protein
LNSL_0302	1.1368	chromosome	337642	337821	+	Hypothetical protein
LNSL_0303	1.30061	chromosome	337911	338864	+	Glycerate dehydrogenase
LNSL_0312	1.40362	chromosome	347686	349098	-	Uncharacterized transporter HI_0608
LNSL_0317	1.08159	chromosome	354122	357601	-	Ribonuclease E
LNSL_0324	1.02014	chromosome	365478	366338	+	2-hydroxymuconate semialdehyde hydrolase
LNSL_0345	1.42445	chromosome	387289	388164	-	HTH-type transcriptional activator CmpR
LNSL_0346	6.31493	chromosome	388356	388592	-	Hypothetical protein
LNSL_0347	1.04121	chromosome	388852	390285	+	3-isopropylmalate dehydratase large subunit
LNSL_0348	1.04384	chromosome	390307	390957	+	3-isopropylmalate dehydratase small subunit
LNSL_0354	1.08939	chromosome	394319	395326	+	Ornithine utilization regulator
LNSL_0365	1.49951	chromosome	407848	408297	+	Hypothetical protein
LNSL_0366	1.08485	chromosome	408328	410970	+	DNA topoisomerase 1
LNSL_0405	1.62743	chromosome	444811	447126	-	Probable TonB-dependent receptor BfrD
LNSL_0406	1.19315	chromosome	447440	449695	-	Iron-regulated outer membrane virulence protein
LNSL_0425	1.5102	chromosome	475257	476063	+	Enoyl-[acyl-carrier-protein] reductase [NADH] FabI
LNSL_0433	1.01481	chromosome	480594	482429	+	Protein sel-1 homolog 1
LNSL_0449	1.04128	chromosome	500745	501266	+	Hypothetical protein
LNSL_0500	1.61332	chromosome	550257	550754	-	Protein PsiE homolog
LNSL_0537	2.52246	chromosome	587884	588171	-	Hypothetical protein
LNSL_0541	1.58227	chromosome	592302	593126	+	Acetyl-coenzyme A carboxylase carboxyl transferase subunit alpha
LNSL_0581	1.39332	chromosome	642078	643175	+	Inner membrane protein YjgN
LNSL_0586	1.00055	chromosome	646524	647006	+	Methylated-DNA--protein-cysteine methyltransferase
LNSL_0617	1.11102	chromosome	680516	680932	-	Biopolymer transport protein exbD2
LNSL_0618	1.69762	chromosome	680954	681379	-	Biopolymer transport protein exbD1
LNSL_0619	1.42468	chromosome	681396	682292	-	Biopolymer transport protein ExbB
LNSL_0620	1.36679	chromosome	682332	683033	-	Protein tonB2
LNSL_0621	1.0916	chromosome	683182	685848	-	Vitamin B12 transporter BtuB
LNSL_0626	1.40109	chromosome	693140	694291	+	Oligopeptide transport system permease protein AppC
LNSL_0627	1.01788	chromosome	694302	696032	+	Glutathione import ATP-binding protein GsiA
LNSL_0647	1.28128	chromosome	710935	711387	-	UPF0093 membrane protein jhp_1377
LNSL_0680	1.3692	chromosome	743920	745041	-	Twitching mobility protein
LNSL_0750	1.39385	chromosome	812825	814153	+	Putative tartrate transporter
LNSL_0751	1.41453	chromosome	814184	815707	+	Hypothetical protein
LNSL_0791	1.34242	chromosome	859597	860451	-	Protein QmcA
LNSL_0792	1.61703	chromosome	860464	860937	-	Uncharacterized protein MJ0826
LNSL_0795	1.02811	chromosome	862194	862649	-	Hypothetical protein
LNSL_0817	1.51776	chromosome	890510	892573	+	Iron-regulated outer membrane virulence protein
LNSL_0842	1.77074	chromosome	918539	918979	-	Universal stress protein MJ0531
LNSL_0860	1.85611	chromosome	939925	940575	-	Inner membrane protein YqiK
LNSL_0864	1.72132	chromosome	943481	945097	+	Bifunctional enzyme CysN/CysC
LNSL_0953	1.18009	chromosome	1038660	1039730	+	Uroporphyrinogen decarboxylase
LNSL_0955	1.97182	chromosome	1040688	1041158	+	Hypothetical protein
LNSL_1022	1.05192	chromosome	1093796	1095205	+	3-hydroxylaminophenol mutase
LNSL_1038	1.29774	chromosome	1107567	1108928	+	Putative pyrimidine permease RutG
LNSL_1039	1.09473	chromosome	1108980	1109819	+	2-(hydroxymethyl)glutarate dehydrogenase
LNSL_1043	1.22744	chromosome	1114599	1116014	+	Soluble pyridine nucleotide transhydrogenase
LNSL_1098	1.07431	chromosome	1172550	1172981	+	Hypothetical protein
LNSL_1126	1.72439	chromosome	1200518	1202617	+	Carbon starvation protein A
LNSL_1127	1.93591	chromosome	1202628	1202930	+	Uncharacterized protein YbdD
LNSL_1177	1.04092	chromosome	1252406	1254094	+	Acyl-CoA synthetase family member 2, mitochondrial
LNSL_1255	2.52559	chromosome	1329977	1330366	+	Hypothetical protein
LNSL_1309	1.12617	chromosome	1390371	1391522	-	Putative transposase y4zB
LNSL_1413	1.04652	chromosome	1492693	1493832	-	Uncharacterized protein y4iL
LNSL_1438	1.80466	chromosome	1516025	1517359	-	Putative transposase y4bF
LNSL_1447	1.01481	chromosome	1525120	1526493	-	5-methylthioadenosine/S-adenosylhomocysteine deaminase
LNSL_1451	1.29684	chromosome	1530352	1531452	-	Purine-binding protein BAB2_0673
LNSL_1452	1.96278	chromosome	1531894	1532640	-	Putative transposase for insertion sequence element IS6501
LNSL_1475	1.02358	chromosome	1557448	1558575	-	Acyl-CoA dehydrogenase
LNSL_1484	1.09727	chromosome	1567339	1567983	-	Cis,cis-muconate transport protein
LNSL_1491	1.46176	chromosome	1577164	1578144	-	Nitronate monooxygenase
LNSL_1496	1.561	chromosome	1581322	1582533	-	Beta-ketoadipyl-CoA thiolase
LNSL_1520	2.19315	chromosome	1615463	1615660	-	Hypothetical protein
LNSL_1523	1.71525	chromosome	1618808	1619257	+	Cyanate hydratase
LNSL_1542	1.39054	chromosome	1640049	1641125	+	Probable iron/ascorbate oxidoreductase DDB_G0283291
LNSL_1545	1.51999	chromosome	1643104	1644129	-	Putative aliphatic sulfonates-binding protein
LNSL_1547	1.18078	chromosome	1645204	1647012	-	Allophanate hydrolase
LNSL_1549	2.75177	chromosome	1647460	1647591	-	Hypothetical protein
LNSL_1558	1.2195	chromosome	1660132	1661298	-	Stearoyl-CoA 9-desaturase
LNSL_1567	1.08764	chromosome	1671360	1671650	+	Muconolactone Delta-isomerase
LNSL_1568	1.91884	chromosome	1671813	1672733	+	Catechol 1,2-dioxygenase
LNSL_1569	1.82799	chromosome	1672809	1674197	+	Benzoate 1,2-dioxygenase subunit alpha
LNSL_1570	2.10479	chromosome	1674194	1674685	+	Benzoate 1,2-dioxygenase subunit beta
LNSL_1571	1.81503	chromosome	1674776	1675792	+	Benzoate 1,2-dioxygenase electron transfer component
LNSL_1572	1.69783	chromosome	1675810	1676595	+	1,6-dihydroxycyclohexa-2,4-diene-1-carboxylate dehydrogenase
LNSL_1573	1.9261	chromosome	1676654	1677874	+	Benzoate membrane transport protein
LNSL_1574	1.89494	chromosome	1677912	1678583	+	3-oxoadipate CoA-transferase subunit A
LNSL_1575	2.02487	chromosome	1678603	1679259	+	3-oxoadipate CoA-transferase subunit B
LNSL_1576	2.06711	chromosome	1679396	1680601	+	Beta-ketoadipyl-CoA thiolase
LNSL_1577	2.00418	chromosome	1680661	1681440	+	3-oxoadipate enol-lactonase 2
LNSL_1591	1.29622	chromosome	1697555	1698229	+	UPF0700 transmembrane protein RA0705
LNSL_1668	1.0239	chromosome	1778715	1779128	+	Uncharacterized HIT-like protein MJ0866
LNSL_1669	1.20429	chromosome	1779473	1780606	+	Major outer membrane protein P.IB
LNSL_1673	4.26274	chromosome	1783997	1784098	+	Uncharacterized protein YbgT
LNSL_1721	1.07447	chromosome	1832628	1834274	-	Acetyl-coenzyme A synthetase
LNSL_1738	1.97733	chromosome	1852436	1853056	+	Cytochrome o ubiquinol oxidase subunit 3
LNSL_1739	1.95273	chromosome	1853056	1853382	+	Cytochrome o ubiquinol oxidase protein CyoD
LNSL_1776	1.64096	chromosome	1890117	1890560	+	Universal stress protein MJ0531
LNSL_1777	1.83987	chromosome	1890697	1891143	+	Universal stress protein MJ0531
LNSL_1780	1.51172	chromosome	1894570	1894827	+	Hypothetical protein
LNSL_1789	1.74049	chromosome	1906510	1907517	-	HTH-type transcriptional regulator VqsM
LNSL_1809	1.37461	chromosome	1922540	1922881	-	Hypothetical protein
LNSL_1842	1.17897	chromosome	1957122	1958687	+	Alkyl hydroperoxide reductase subunit F
LNSL_1875	1.06508	chromosome	1997359	1999314	-	Alkyl/aryl-sulfatase BDS1
LNSL_1905	1.11434	chromosome	2031846	2032490	+	Hypothetical protein
LNSL_1942	1.0727	chromosome	2068193	2069194	-	Adenine deaminase
LNSL_1974	5.00282	chromosome	2101059	2102624	-	Alkyl hydroperoxide reductase subunit F
LNSL_1980	1.60912	chromosome	2108424	2109671	-	Hypothetical protein
LNSL_1982	2.2372	chromosome	2110803	2111450	+	Hypothetical protein
LNSL_2018	1.35184	chromosome	2145349	2146356	+	Sulfate-binding protein
LNSL_2020	1.30133	chromosome	2147578	2148183	+	Hypothetical protein
LNSL_2021	1.84755	chromosome	2148269	2149102	+	Probable sulfate transport system permease protein cysT
LNSL_2022	1.5967	chromosome	2149099	2149992	+	Sulfate transport system permease protein CysW
LNSL_2023	1.32053	chromosome	2150004	2151065	+	Sulfate/thiosulfate import ATP-binding protein CysA
LNSL_2024	1.08053	chromosome	2151119	2152042	+	HTH-type transcriptional regulator cbl
LNSL_2033	2.11434	chromosome	2158868	2159473	-	Putative amino-acid transporter Mb2008
LNSL_2070	6.16659	chromosome	2196187	2197056	+	Probable transposase for transposon Tn903
LNSL_2152	1.00151	chromosome	2289642	2290235	-	HTH-type transcriptional repressor AcnR
LNSL_2153	1.75177	chromosome	2290372	2290767	+	RutC family protein YjgH
LNSL_2232	2.08746	chromosome	2367633	2370359	+	Sulfite reductase [NADPH] flavoprotein alpha-component
LNSL_2241	1.16561	chromosome	2377240	2381691	-	Chemotaxis protein CheA
LNSL_2285	1.02409	chromosome	2427644	2427952	-	NADH-quinone oxidoreductase subunit K
LNSL_2286	1.15127	chromosome	2427952	2428473	-	NADH-quinone oxidoreductase subunit J
LNSL_2287	1.38711	chromosome	2428470	2429012	-	NADH-quinone oxidoreductase subunit I
LNSL_2288	1.35423	chromosome	2429031	2430047	-	NADH-quinone oxidoreductase subunit H
LNSL_2289	1.2946	chromosome	2430051	2432729	-	NADH-quinone oxidoreductase subunit G
LNSL_2291	1.07025	chromosome	2434069	2434578	-	NADH-quinone oxidoreductase subunit E
LNSL_2299	1.22126	chromosome	2444810	2444935	+	Hypothetical protein
LNSL_2301	1.17843	chromosome	2445266	2446549	+	Ribonucleoside-diphosphate reductase subunit beta
LNSL_2315	1.15387	chromosome	2464049	2464387	-	Protein PhnA
LNSL_2329	1.24799	chromosome	2478703	2479629	-	Putative malonate transporter
LNSL_2340	1.30717	chromosome	2491118	2492176	-	Outer membrane protein Omp38
LNSL_2349	1.28469	chromosome	2501162	2503297	+	Fatty acid oxidation complex subunit alpha
LNSL_2358	1.13522	chromosome	2511064	2511873	-	1-acyl-sn-glycerol-3-phosphate acyltransferase
LNSL_2380	1.62529	chromosome	2536264	2536905	+	Peroxiredoxin-like protein DDB_G0282517, mitochondrial
LNSL_2399	1.03531	chromosome	2555937	2557835	+	Protein translocase subunit SecD
LNSL_2400	1.13707	chromosome	2557847	2558818	+	Protein translocase subunit SecF
LNSL_2415	1.5266	chromosome	2576793	2577437	-	Hypothetical protein
LNSL_2442	1.05801	chromosome	2604620	2604877	-	Hypothetical protein
LNSL_2481	1.23001	chromosome	2642956	2644128	+	Long-chain specific acyl-CoA dehydrogenase, mitochondrial
LNSL_2513	1.00337	chromosome	2661842	2663392	+	Uncharacterized protein YjgR
LNSL_2519	1.00121	chromosome	2668581	2671148	+	Glycerol-3-phosphate acyltransferase
LNSL_2544	1.16215	chromosome	2696619	2697563	-	Hypothetical protein
LNSL_2561	1.37389	chromosome	2711874	2712170	+	Uncharacterized membrane protein YdzA
LNSL_2590	1.68723	chromosome	2737030	2737518	-	Hypothetical protein
LNSL_2591	2.49594	chromosome	2737554	2738126	-	Fimbrial protein
LNSL_2605	1.13415	chromosome	2750182	2751603	-	Glutamate synthase [NADPH] small chain
LNSL_2642	1.20055	chromosome	2797163	2797567	-	Ribosome-binding factor A
LNSL_2663	1.97258	chromosome	2820879	2820995	+	Hypothetical protein
LNSL_2672	2.7452	chromosome	2829136	2829387	-	Hypothetical protein
LNSL_2673	2.41788	chromosome	2829447	2831303	-	Ferrous iron transport protein B
LNSL_2674	2.09281	chromosome	2831300	2831560	-	Hypothetical protein
LNSL_2688	1.03424	chromosome	2847844	2848251	+	DNA polymerase III subunit chi
LNSL_2695	1.43617	chromosome	2853291	2854703	-	Ammonia channel
LNSL_2735	1.28131	chromosome	2904995	2906389	-	ATP synthase subunit beta
LNSL_2737	1.35638	chromosome	2907375	2908919	-	ATP synthase subunit alpha
LNSL_2738	1.51615	chromosome	2908965	2909501	-	ATP synthase subunit delta
LNSL_2739	1.33424	chromosome	2909514	2909984	-	ATP synthase subunit b
LNSL_2740	1.06815	chromosome	2910024	2910269	-	ATP synthase subunit c
LNSL_2771	1.42737	chromosome	2940852	2941688	-	Sporulation initiation inhibitor protein soj
LNSL_2815	1.26927	chromosome	2990131	2991735	+	Transposon Tn7 transposition protein TnsE
LNSL_2816	1.2977	chromosome	2991907	2993427	+	Hypothetical protein
LNSL_2857	1.15438	chromosome	3041095	3041457	+	Uncharacterized 16.1 kDa HIT-like protein
LNSL_2866	4.01481	chromosome	3048623	3048820	-	Hypothetical protein
LNSL_2867	4.59977	chromosome	3048890	3049117	-	Hypothetical protein
LNSL_2868	3.33465	chromosome	3049230	3049445	-	Major cold shock protein
LNSL_2877	1.65866	chromosome	3062644	3062757	-	Hypothetical protein
LNSL_2878	1.52478	chromosome	3062778	3062957	-	Hypothetical protein
LNSL_2896	1.5708	chromosome	3082460	3083824	-	Benzoate transport protein
LNSL_2959	1.49594	pNL1	32282	32752	-	Hypothetical protein
LNSL_2960	1.39947	pNL1	32818	33225	-	Hypothetical protein
LNSL_2962	1.01481	pNL1	33936	34739	-	Hypothetical protein
LNSL_2972	2.33674	pNL1	44840	45085	+	Hypothetical protein
LNSL_2975	2.22002	pNL1	48593	48886	+	Phenol hydroxylase P0 protein
LNSL_2976	1.9789	pNL1	48906	49910	+	Phenol hydroxylase P1 protein
LNSL_2977	1.86417	pNL1	49922	50188	+	Phenol hydroxylase P2 protein
LNSL_2978	2.35802	pNL1	50237	51763	+	Phenol hydroxylase P3 protein
LNSL_2979	2.87066	pNL1	51881	52243	+	Phenol hydroxylase P4 protein
LNSL_2980	2.89084	pNL1	52312	53373	+	Phenol hydroxylase P5 protein
LNSL_2981	3.22676	pNL1	53521	54441	+	Catechol 1,2-dioxygenase
LNSL_2982	3.63756	pNL1	54600	55472	+	Hypothetical protein
LNSL_2986	1.71166	pNL1	56421	56717	-	Insertion element IS401 uncharacterized 12.4 kDa protein
LNSL_3000	1.63562	pNL1	67229	68008	-	3-oxoadipate enol-lactonase 2
LNSL_3001	1.05484	pNL1	68126	69331	-	Beta-ketoadipyl-CoA thiolase
LNSL_3004	1.691	pNL1	71008	71298	-	Muconolactone Delta-isomerase
LNSL_3014	1.79908	pNL1	80154	80432	+	Hypothetical protein
LNSL_3022	1.44777	pNL1	85577	86002	-	Hypothetical protein
LNSL_3027	1.20745	pNL1	88398	89231	-	Hypothetical protein
LNSL_3028	1.0804	pNL1	89244	89885	-	Hypothetical protein
LNSL_3029	1.73102	pNL1	90106	90636	-	Hypothetical protein
LNSL_3034	2.5694	pNL1	93048	94145	-	Uncharacterized 37.8 kDa protein in gpa 5'region
LNSL_3043	1.71525	pNL1	99373	99909	-	Hypothetical protein
LNSL_3046	1.10227	pNL1	101576	102469	-	Hypothetical protein
LNSL_3050	2.06543	pNL1	104542	104811	-	Hypothetical protein
LNSL_3059	1.2294	pNL1	111247	112131	-	Hypothetical protein
LNSL_3068	1.9659	pNL1	118263	118769	+	Uncharacterized endonuclease HI_1296
LNSL_3098	1.00274	pNL1	153657	154493	+	Hypothetical protein
LNSL_3123	1.32957	pNL1	174160	174510	-	Mercuric transport protein
LNSL_3125	1.26274	pNL1	175246	175926	-	Uncharacterized protein HI_1054
LNSL_3127	1.06448	pNL1	176910	177188	+	Mercuric transport protein periplasmic component
LNSL_3136	1.72562	pNL1	182102	183730	-	Fe(3+)-transport system permease protein FbpB 2
LNSL_3137	1.32772	pNL1	183812	184828	-	Iron deficiency-induced protein A
LNSL_3139	1.60592	pNL1	186877	186987	+	Hypothetical protein
LNSL_3140	2.27261	pNL1	186974	187288	+	Hypothetical protein
LNSL_3150	1.00758	pNL1	198099	199124	+	Hypothetical protein
LNSL_3162	1.28963	pNL1	206740	207306	+	Hypothetical protein
LNSL_3171	1.1953	pNL1	218674	219570	-	HTH-type transcriptional activator TtdR
LNSL_3204	1.84781	pNL1	251962	252267	-	Hypothetical protein
LNSL_3252	1.3009	pNL2	1218	2336	+	Adenosine monophosphate-protein transferase FICD
LNSL_3291	4.67815	pNL2	33182	33625	+	Uncharacterized protein YqjI
LNSL_3301	1.04876	pNL3	5039	5218	+	Hypothetical protein
LNSL_3328	1.05849	pNL3	33225	34394	+	Putative 8-amino-7-oxononanoate synthase
LNSL_3341	1.45505	pNL3	51362	52225	+	Hypothetical protein
LNSL_3371	1.44777	pNL3	78187	78672	+	Hypothetical protein
LNSL_3387	1.11434	pNL3	93334	94233	-	Uncharacterized HTH-type transcriptional regulator YafC
LNSL_3407	1.17371	pNL3	111913	112563	-	Protein-S-isoprenylcysteine O-methyltransferase
LNSL_3444	3.59977	pNL3	139401	139661	-	Hypothetical protein
LNSL_3464	1.61963	pNL3	158286	159344	+	(R,R)-butanediol dehydrogenase
LNSL_3483	1.54532	pNL3	172811	173227	-	UPF0394 membrane protein PD_1892
LNSL_3485	1.23776	pNL3	173807	174103	+	Uncharacterized protein HI_1419
LNSL_3486	1.0341	pNL3	174105	174395	+	Uncharacterized protein HI_1420
LNSL_0014	-1.19126	chromosome	16883	17713	-	Beta-lactamase OXA-10
LNSL_0039	-1.00405	chromosome	48766	49185	-	Hypothetical protein
LNSL_0048	-1.25218	chromosome	55576	56166	+	1,6-anhydro-N-acetylmuramyl-L-alanine amidase AmpD
LNSL_0087	-1.59578	chromosome	100054	100761	-	Hypothetical protein
LNSL_0088	-1.67225	chromosome	100828	101550	-	Hypothetical protein
LNSL_0096	-1.69928	chromosome	109290	109859	+	FMN-dependent NADH-azoreductase
LNSL_0217	-1.03482	chromosome	238118	239917	+	UvrABC system protein C
LNSL_0218	-1.02178	chromosome	240033	240827	+	Hypothetical protein
LNSL_0353	-1.45057	chromosome	393866	394087	-	Translation initiation factor IF-1
LNSL_0389	-1.87921	chromosome	430489	431004	+	Hypothetical protein
LNSL_0414	-1.72325	chromosome	459292	460512	-	Acetate kinase
LNSL_0452	-2.08325	chromosome	502240	502557	+	Insertion element IS401 uncharacterized 12.4 kDa protein
LNSL_0492	-1.24525	chromosome	541126	541989	-	Protein Ddg
LNSL_0526	-1.30613	chromosome	578836	579291	-	16 kDa heat shock protein B
LNSL_0529	-1.25528	chromosome	580569	580991	+	Inner membrane protein YqaA
LNSL_0576	-1.05587	chromosome	637255	637920	+	Uncharacterized protein YeaZ
LNSL_0713	-1.51191	chromosome	777640	778095	-	Hypothetical protein
LNSL_0727	-3.57015	chromosome	790189	790347	+	Hypothetical protein
LNSL_0801	-1.31142	chromosome	868153	869193	+	Hypothetical protein
LNSL_0816	-1.49915	chromosome	889678	890316	+	Fe/S biogenesis protein NfuA
LNSL_0833	-1.16716	chromosome	908560	909054	-	Esterase YqiA
LNSL_0857	-1.28636	chromosome	937150	938304	-	Inner membrane protein YqiK
LNSL_0966	-1.40023	chromosome	1050543	1050785	-	Hypothetical protein
LNSL_0982	-1.37751	chromosome	1060945	1061838	+	Hypothetical protein
LNSL_0987	-1.79106	chromosome	1064072	1064311	+	Hypothetical protein
LNSL_1020	-2.28065	chromosome	1090961	1091584	-	Hypothetical protein
LNSL_1051	-1.38752	chromosome	1121746	1122609	+	Hypothetical protein
LNSL_1064	-2.15512	chromosome	1138078	1138359	+	Uncharacterized protein ORF88
LNSL_1096	-9.01152	chromosome	1170176	1171327	+	Putative transposase y4zB
LNSL_1137	-1.07355	chromosome	1212607	1212897	-	Hypothetical protein
LNSL_1165	-1.0384	chromosome	1238057	1239073	+	Aspartate carbamoyltransferase
LNSL_1178	-1.03609	chromosome	1254377	1255045	+	tRNA (cmo5U34)-methyltransferase
LNSL_1195	-1.24411	chromosome	1267748	1268887	+	Hypothetical protein
LNSL_1202	-1.06692	chromosome	1275456	1276421	+	Glyoxylate/hydroxypyruvate reductase B
LNSL_1252	-1.4565	chromosome	1327269	1328528	+	Hypothetical protein
LNSL_1254	-1.02267	chromosome	1329371	1329880	+	Hypothetical protein
LNSL_1262	-2.3637	chromosome	1337987	1338109	+	Hypothetical protein
LNSL_1285	-1.83793	chromosome	1360281	1360604	-	Ferredoxin 1
LNSL_1319	-1.19393	chromosome	1400551	1401906	+	Putative zinc metalloprotease PA3649
LNSL_1334	-1.17784	chromosome	1414543	1415208	+	Uncharacterized protein YraR
LNSL_1352	-1.26768	chromosome	1429313	1429822	-	Peptidyl-prolyl cis-trans isomerase cyp18
LNSL_1356	-1.12914	chromosome	1433990	1434214	-	Hypothetical protein
LNSL_1357	-1.11729	chromosome	1434458	1435540	-	tRNA (uracil(54)-C(5))-methyltransferase
LNSL_1390	-1.37751	chromosome	1473080	1473760	+	Hypothetical protein
LNSL_1396	-1.27084	chromosome	1479091	1479564	-	Hypothetical protein
LNSL_1399	-1.53141	chromosome	1481582	1482466	+	Methylisocitrate lyase
LNSL_1421	-1.26391	chromosome	1502407	1502874	+	Cys-tRNA(Pro)/Cys-tRNA(Cys) deacylase YbaK
LNSL_1531	-1.20758	chromosome	1626157	1626423	-	Hypothetical protein
LNSL_1556	-1.03173	chromosome	1658728	1659438	+	Phosphorylated carbohydrates phosphatase TM_1254
LNSL_1583	-1.60668	chromosome	1688189	1688794	+	HTH-type transcriptional regulator QacR
LNSL_1637	-2.3155	chromosome	1747089	1747397	+	Hypothetical protein
LNSL_1638	-1.34875	chromosome	1747558	1748934	+	Chaperone activity of bc1 complex-like, mitochondrial
LNSL_1643	-1.11402	chromosome	1752420	1753001	+	SPBc2 prophage-derived uncharacterized transglycosylase YomI
LNSL_1644	-1.24114	chromosome	1753427	1753639	+	Hypothetical protein
LNSL_1677	-1.77874	chromosome	1787211	1787924	-	2-C-methyl-D-erythritol 4-phosphate cytidylyltransferase
LNSL_1695	-2.30712	chromosome	1805301	1805516	-	Hypothetical protein
LNSL_1696	-1.13203	chromosome	1805684	1806442	-	Hypothetical protein
LNSL_1717	-1.03582	chromosome	1828714	1829094	-	Dihydroneopterin aldolase
LNSL_1784	-1.1653	chromosome	1899867	1900331	+	Hypothetical protein
LNSL_1791	-1.14439	chromosome	1908770	1909222	+	Putative sterigmatocystin biosynthesis monooxygenase stcW
LNSL_1798	-1.38528	chromosome	1914706	1915137	-	Hypothetical protein
LNSL_1805	-1.05734	chromosome	1919963	1920313	-	Hypothetical protein
LNSL_1874	-1.61089	chromosome	1995991	1997001	+	Transposase for insertion sequence element IS1086
LNSL_1892	-1.14825	chromosome	2021252	2021866	+	Hypothetical protein
LNSL_1927	-1.79255	chromosome	2054486	2054794	-	Hypothetical protein
LNSL_1963	-1.62408	chromosome	2091920	2092285	-	Protein YgiW
LNSL_1967	-1.18828	chromosome	2096423	2097202	+	Ferredoxin--NADP reductase
LNSL_1990	-1.16474	chromosome	2119252	2119905	+	Hypothetical protein
LNSL_2011	-1.03582	chromosome	2138270	2138722	-	Uncharacterized protein YneP
LNSL_2032	-2.57015	chromosome	2157895	2158335	-	UPF0312 protein VPA0850
LNSL_2043	-3.15512	chromosome	2168444	2168917	+	Hypothetical protein
LNSL_2058	-1.5126	chromosome	2186359	2187654	+	Neurofilament heavy polypeptide
LNSL_2088	-1.16169	chromosome	2214460	2215920	+	Hypothetical protein
LNSL_2124	-1.05889	chromosome	2257103	2257489	-	Hypothetical protein
LNSL_2158	-1.21982	chromosome	2293903	2294382	+	SsrA-binding protein
LNSL_2170	-1.3381	chromosome	2306554	2307135	+	Peptidyl-tRNA hydrolase
LNSL_2217	-1.05169	chromosome	2350570	2351184	-	Glutathione S-transferase F13
LNSL_2235	-1.67651	chromosome	2373214	2373747	-	Putative L,D-transpeptidase YqjB
LNSL_2237	-1.59524	chromosome	2374314	2375189	+	Hypothetical protein
LNSL_2254	-1.15611	chromosome	2399020	2399589	-	Deoxycytidine triphosphate deaminase
LNSL_2281	-1.12012	chromosome	2421830	2422465	-	Uracil phosphoribosyltransferase
LNSL_2321	-1.1792	chromosome	2468962	2469210	-	Hypothetical protein
LNSL_2332	-1.0098	chromosome	2482560	2483420	+	Formamidopyrimidine-DNA glycosylase
LNSL_2333	-1.01566	chromosome	2483417	2483701	+	Peptidyl-prolyl cis-trans isomerase C
LNSL_2402	-1.12355	chromosome	2559628	2561937	-	GTP pyrophosphokinase
LNSL_2478	-1.12732	chromosome	2640559	2641599	-	Hypothetical protein
LNSL_2528	-2.96326	chromosome	2678624	2679856	+	Hypothetical protein
LNSL_2569	-1.78188	chromosome	2719711	2720280	-	Hypothetical protein
LNSL_2607	-1.53527	chromosome	2756601	2757479	-	Hypothetical protein
LNSL_2624	-1.00164	chromosome	2775523	2776434	-	Ribosomal RNA small subunit methyltransferase H
LNSL_2668	-2.0325	chromosome	2825240	2826103	+	Glutamyl-Q tRNA(Asp) synthetase
LNSL_2733	-1.01376	chromosome	2903676	2904467	-	Hypothetical protein
LNSL_2766	-1.07265	chromosome	2935974	2936906	-	Mrr restriction system protein
LNSL_2783	-4.23312	chromosome	2949281	2949646	-	Hypothetical protein
LNSL_2784	-1.57015	chromosome	2949676	2950545	-	Hypothetical protein
LNSL_2795	-1.08473	chromosome	2962440	2965802	-	CRISPR-associated nuclease/helicase Cas3 subtype I-F/YPEST
LNSL_2838	-1.09363	chromosome	3018219	3019322	+	EPS I polysaccharide export outer membrane protein EpsA
LNSL_2869	-1.00014	chromosome	3050068	3051201	-	Putative transposase y4zB
LNSL_2917	-1.49727	chromosome	3108836	3109363	+	Hypoxanthine phosphoribosyltransferase
LNSL_2989	-1.0267	pNL1	57894	58973	+	Toluene-4-sulfonate monooxygenase system iron-sulfur subunit TsaM1
LNSL_2990	-1.27993	pNL1	59047	60015	+	Phenoxybenzoate dioxygenase subunit beta
LNSL_3039	-2.20758	pNL1	96868	97431	-	Hypothetical protein
LNSL_3065	-3.98519	pNL1	116033	116455	-	Hypothetical protein
LNSL_3067	-1.37751	pNL1	117323	118177	+	Hypothetical protein
LNSL_3096	-1.13203	pNL1	152201	152890	+	Hypothetical protein
LNSL_3207	-1.98519	pNL1	254040	254528	-	Hypothetical protein
LNSL_3225	-1.05919	pNL1	278829	279635	+	Hypothetical protein
LNSL_3246	-1.02082	pNL1	313560	314117	-	Hypothetical protein
LNSL_3322	-1.14587	pNL3	26525	27985	-	Hypothetical protein
LNSL_3355	-1.05001	pNL3	63254	63595	-	UPF0721 transmembrane protein HI_0902
LNSL_3358	-2.0785	pNL3	65324	66307	-	Hypothetical protein
LNSL_3360	-1.43289	pNL3	67703	68371	+	Uncharacterized protein HI_0882
LNSL_3367	-1.18238	pNL3	73470	73820	-	Hypothetical protein
LNSL_3393	-1.13203	pNL3	98322	98708	-	HTH-type transcriptional regulator ZntR homolog
LNSL_3395	-1.0393	pNL3	99208	100182	-	Hypothetical protein
LNSL_3494	-1.62384	pNL3	179780	180043	-	Probable transposase for insertion sequence element IS702
LNSL_3496	-1.29868	pNL3	181050	186095	-	Hypothetical protein

## Sheet: DEGs with KO
LNSL_0029	K09017
LNSL_0030	K15555
LNSL_0031	K15554
LNSL_0032	K04091
LNSL_0033	K15553
LNSL_0066	K03781
LNSL_0067	K06867
LNSL_0082	K11959
LNSL_0083	K11960
LNSL_0084	K11961
LNSL_0085	K11962
LNSL_0086	K11963
LNSL_0102	K03704
LNSL_0104	K07233
LNSL_0122	K23541
LNSL_0141	K17228
LNSL_0147	K14393
LNSL_0149	K02168
LNSL_0160	K24119
LNSL_0161	K06954
LNSL_0207	K16868
LNSL_0245	K03046
LNSL_0293	K01772
LNSL_0303	K00018
LNSL_0312	K14445
LNSL_0317	K08300
LNSL_0324	K16050
LNSL_0347	K01703
LNSL_0348	K01704
LNSL_0366	K03168
LNSL_0405	K16090
LNSL_0406	K16089
LNSL_0425	K00208
LNSL_0433	K07126
LNSL_0541	K01962
LNSL_0586	K00567
LNSL_0617	K03559
LNSL_0618	K03559
LNSL_0619	K03561
LNSL_0620	K03832
LNSL_0621	K02014
LNSL_0626	K15582
LNSL_0627	K02032
LNSL_0647	K08973
LNSL_0680	K02670
LNSL_0792	K07340
LNSL_0817	K16089
LNSL_0864	K00955
LNSL_0953	K01599
LNSL_1022	K01915
LNSL_1038	K09016
LNSL_1039	K00020
LNSL_1043	K00322
LNSL_1126	K06200
LNSL_1177	K00666
LNSL_1309	K07495
LNSL_1447	K12960
LNSL_1451	K07335
LNSL_1475	K00248
LNSL_1484	K08196
LNSL_1491	K23948
LNSL_1496	K00626
LNSL_1523	K01725
LNSL_1545	K02051
LNSL_1547	K01457
LNSL_1558	K00508
LNSL_1567	K03464
LNSL_1568	K03381
LNSL_1569	K05549
LNSL_1570	K05550
LNSL_1571	K05784
LNSL_1572	K05783
LNSL_1573	K05782
LNSL_1574	K01034
LNSL_1575	K01032
LNSL_1576	K07823
LNSL_1577	K01055
LNSL_1668	K02503
LNSL_1669	K18133
LNSL_1673	K00424
LNSL_1721	K01895
LNSL_1738	K02299
LNSL_1739	K02300
LNSL_1809	K02676
LNSL_1842	K03387
LNSL_1875	K25227
LNSL_1942	K01488
LNSL_1974	K03387
LNSL_2018	K23163
LNSL_2020	K07002
LNSL_2021	K02046
LNSL_2022	K02047
LNSL_2023	K02045
LNSL_2024	K13635
LNSL_2033	K06895
LNSL_2232	K00380
LNSL_2241	K06596
LNSL_2285	K00340
LNSL_2286	K00339
LNSL_2287	K00338
LNSL_2288	K00337
LNSL_2289	K00336
LNSL_2291	K00334
LNSL_2301	K00526
LNSL_2315	K06193
LNSL_2329	K13936
LNSL_2340	K03286
LNSL_2349	K01782
LNSL_2358	K22617
LNSL_2380	K24158
LNSL_2399	K03072
LNSL_2400	K03074
LNSL_2481	K00249
LNSL_2513	K06915
LNSL_2519	K00631
LNSL_2590	K02671
LNSL_2591	K08084
LNSL_2605	K00266
LNSL_2642	K02834
LNSL_2673	K04759
LNSL_2674	K04758
LNSL_2688	K02339
LNSL_2695	K03320
LNSL_2735	K02112
LNSL_2737	K02111
LNSL_2738	K02113
LNSL_2739	K02109
LNSL_2740	K02110
LNSL_2771	K03496
LNSL_2868	K03704
LNSL_2896	K05548
LNSL_2975	K16249
LNSL_2976	K16243
LNSL_2977	K16244
LNSL_2978	K16242
LNSL_2979	K16245
LNSL_2980	K00523
LNSL_2981	K03381
LNSL_3000	K01055
LNSL_3001	K07823
LNSL_3004	K03464
LNSL_3068	K01174
LNSL_3123	K08363
LNSL_3125	K01156
LNSL_3127	K08364
LNSL_3136	K02011
LNSL_3137	K02012
LNSL_3139	K09803
LNSL_3150	K21672
LNSL_3171	K21742
LNSL_3328	K00652
LNSL_3444	K04758
LNSL_3464	K00004
LNSL_3483	K07112
