# Supplementary figures and images for: Comparative Genomic and Transcriptomic Analysis of Phenol Degradation and Tolerance in Acinetobacter lwoffii through Adaptive Evolution
Source: MDPI journal article supplement (doi:10.3390/ijms242216529), 2023-11-20

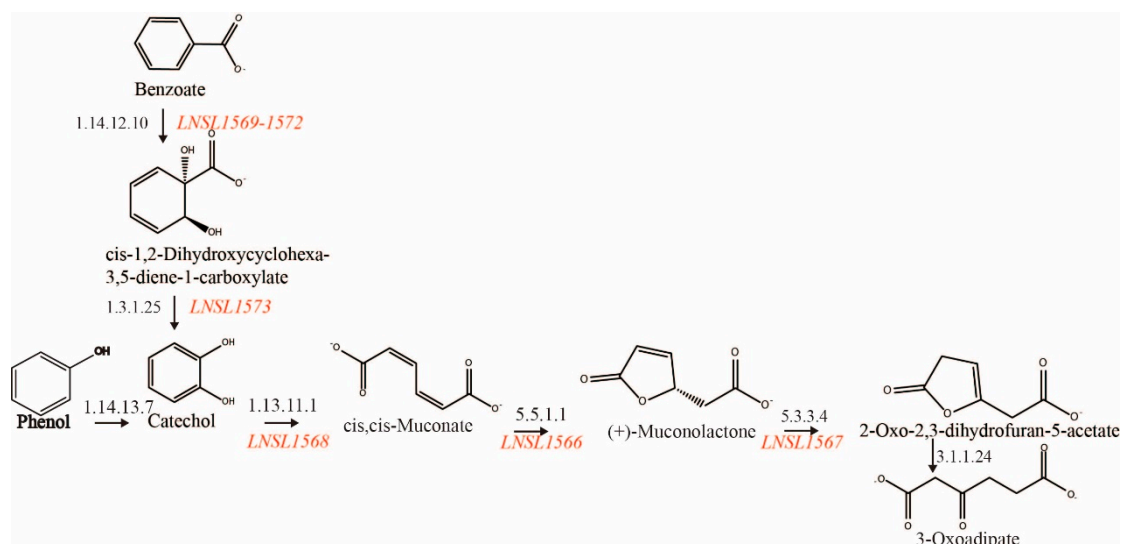

**Figure S5. Metabolic pathway of the upregulated gene cluster *LSNL\_1566-1573*.**

Supplement: s1 [file s1]

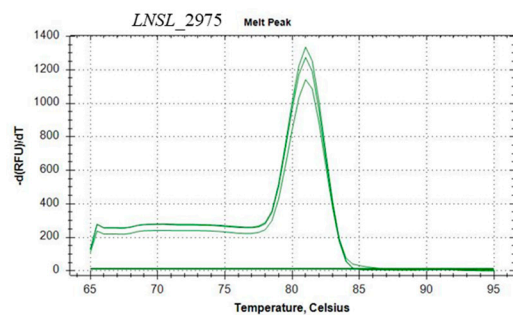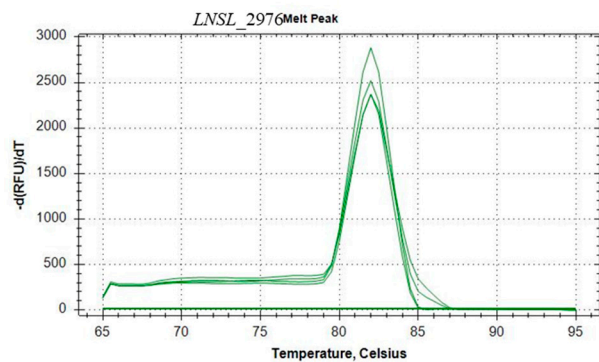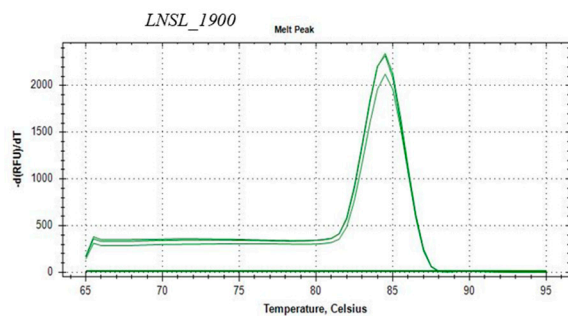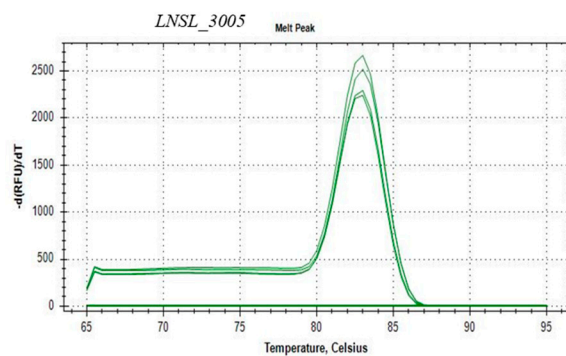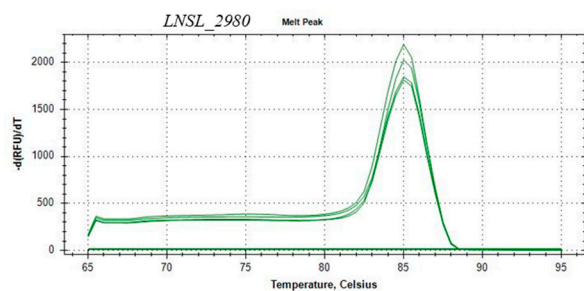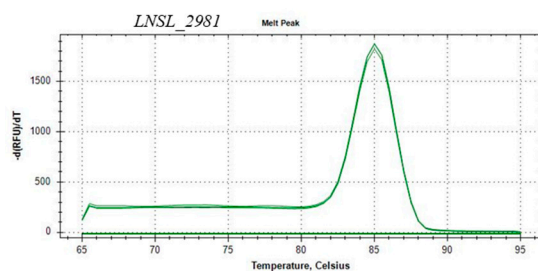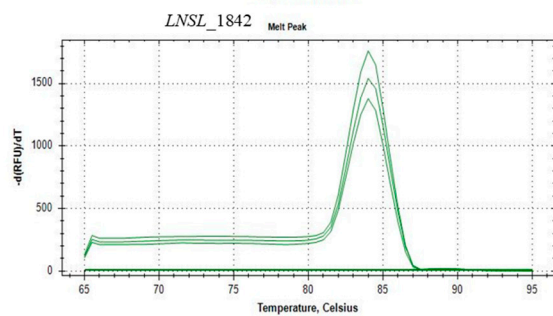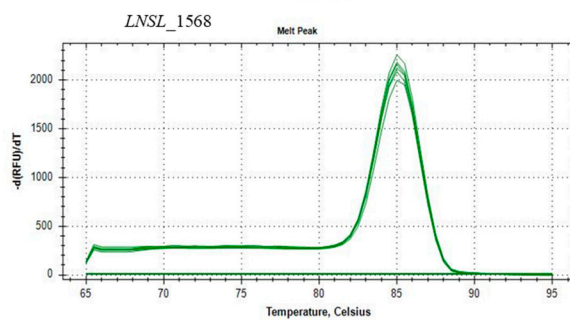

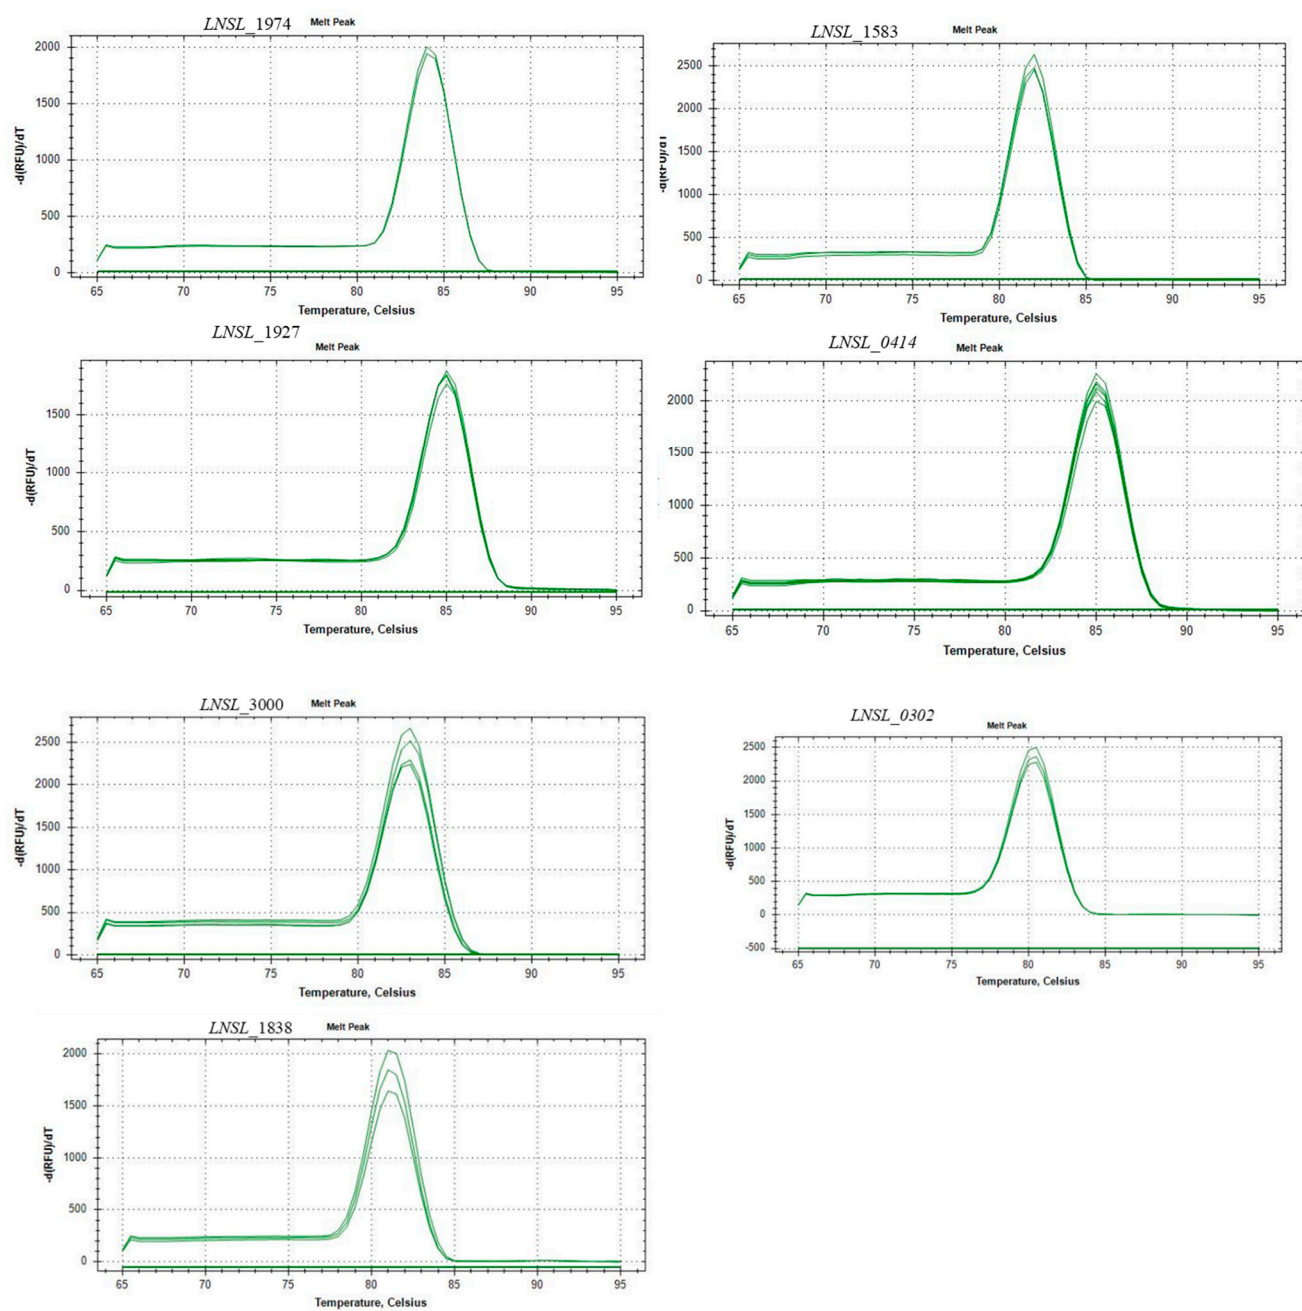

**Figure S3. The melting curves of the qRT-PCR products.**

Supplement: s1 [file s1]

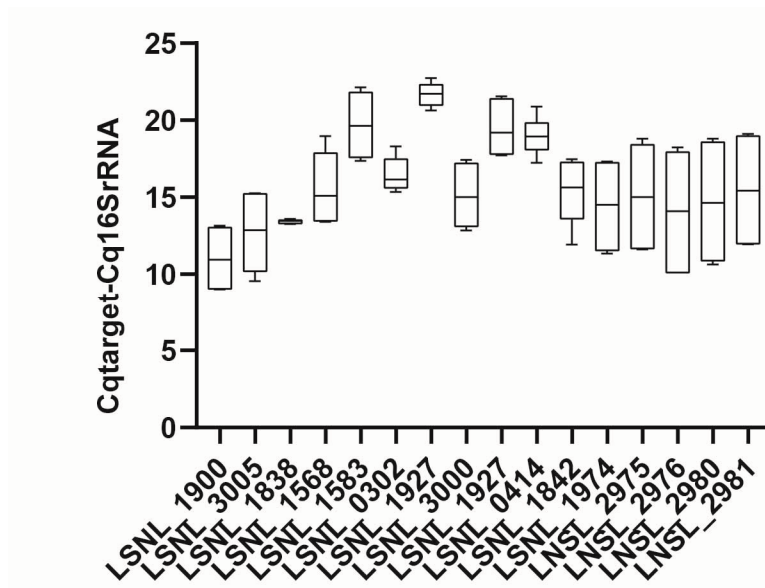

**Figure S2. A boxplot for the CT values of candidate genes from RT-qPCR analysis.**

Supplement: s1 [file s1]

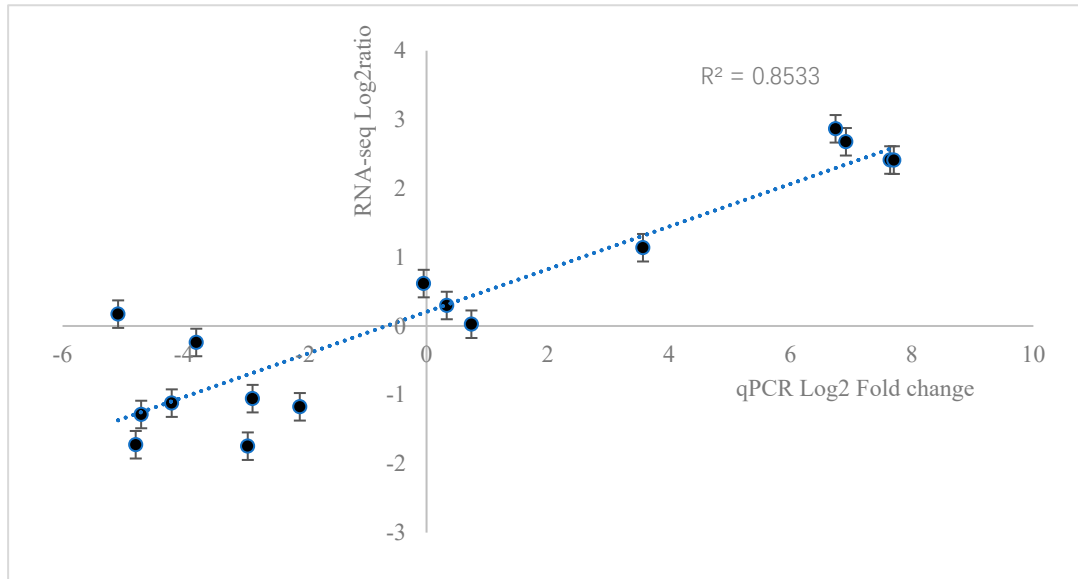

**Figure S4. Accuracy of RNA-seq results verified through qRT-PCR.**

Supplement: s1 [file s1]
